# Supplementary material for: A novel ratiometric and turn-on fluorescent coumarin-based probe for Fe(iii)
Source: Royal Society of Chemistry journal article supplement (doi:10.1039/c9nj02044f), 2019-01-01
Supplement: c9nj02044f1.pdf [file c9nj02044f1.pdf]

## **A novel ratiometric and TURN-ON fluorescent coumarin-based probe for Fe(III)**

Tiziana Pivetta<sup>1\*</sup>, Sebastiano Masuri<sup>1</sup>, Maria Grazia Cabiddu<sup>1</sup>, Claudia Caltagirone<sup>1</sup>, Anna Pintus<sup>1</sup>,  
Michela Massa<sup>1</sup>, Francesco Isaia<sup>1</sup>, Enzo Cadoni<sup>1</sup>

<sup>1</sup> Dipartimento di Scienze Chimiche e Geologiche, Università degli Studi di Cagliari, Cittadella  
Universitaria, 09042 Monserrato CA – ITALY

Address reprints requests to:

Tiziana Pivetta

Dipartimento di Scienze Chimiche e Geologiche

Università degli Studi di Cagliari, Cittadella Universitaria

09042 Monserrato CA – ITALY

Tel. 0039 070 675 4473

mail: [tpivetta@unica.it](mailto:tpivetta@unica.it)

**Keywords** Coumarin; Fe<sup>3+</sup>; Fluorescence; Selectivity

**Supplementary Information**

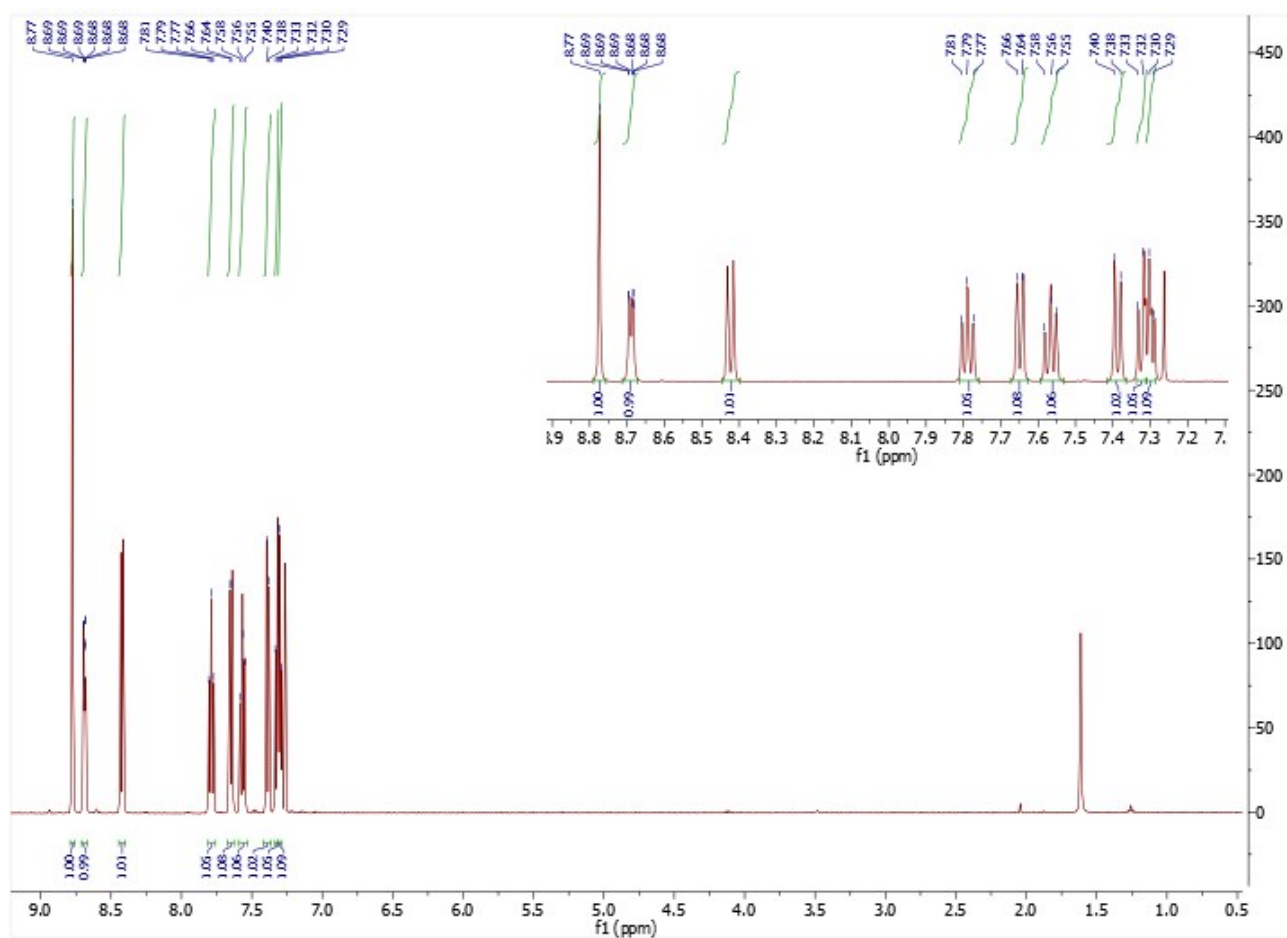

**Figure S1:** <sup>1</sup>H NMR of ligand L1, 3-(pyridin-2-yl)-2H-chromen-2-one. NMR spectra were recorded on a Varian 500 spectrometer at room temperature with trimethylsilane (TMS) as internal standard in CDCl<sub>3</sub>.

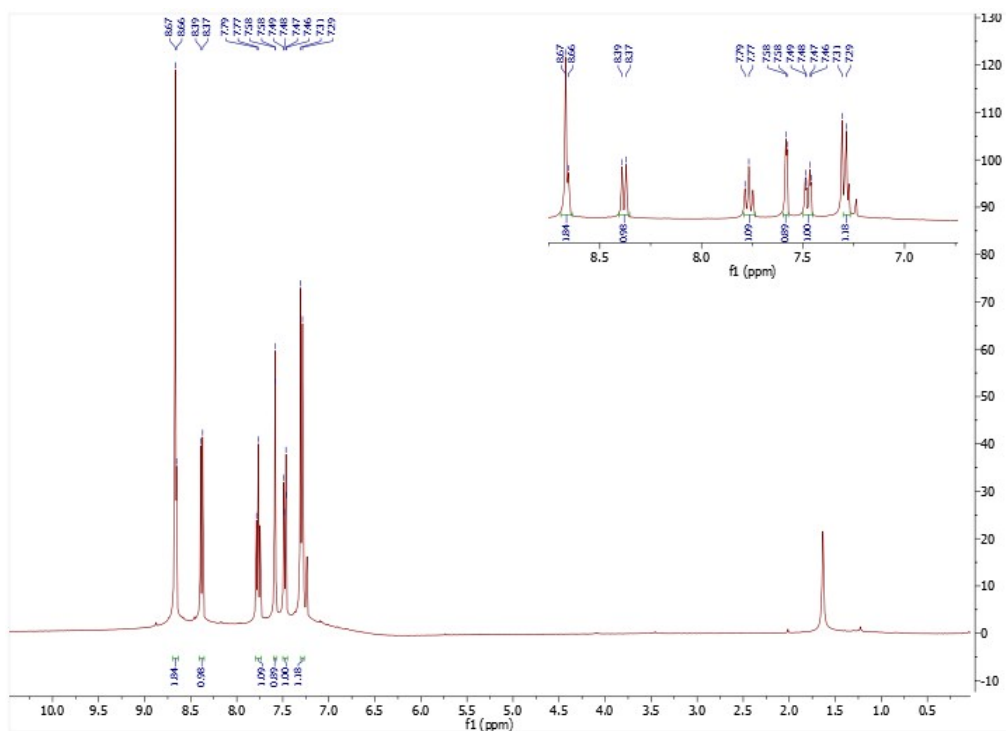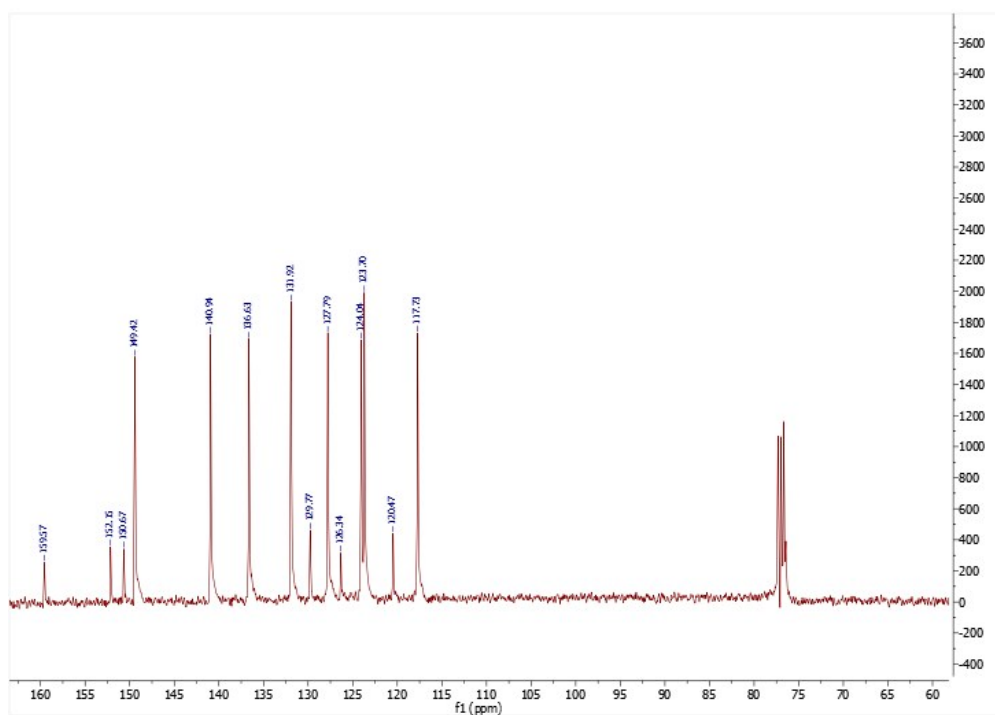

**Figure S2:**  $^1\text{H}$  NMR (top) and  $^{13}\text{C}$  NMR spectrum (bottom) of ligand L2, 6-chloro-3-(pyridin-2-yl)-2*H*-chromen-2-one. NMR spectra were recorded on a Varian 500 spectrometer at room temperature with trimethylsilane (TMS) as internal standard in  $\text{CDCl}_3$ .

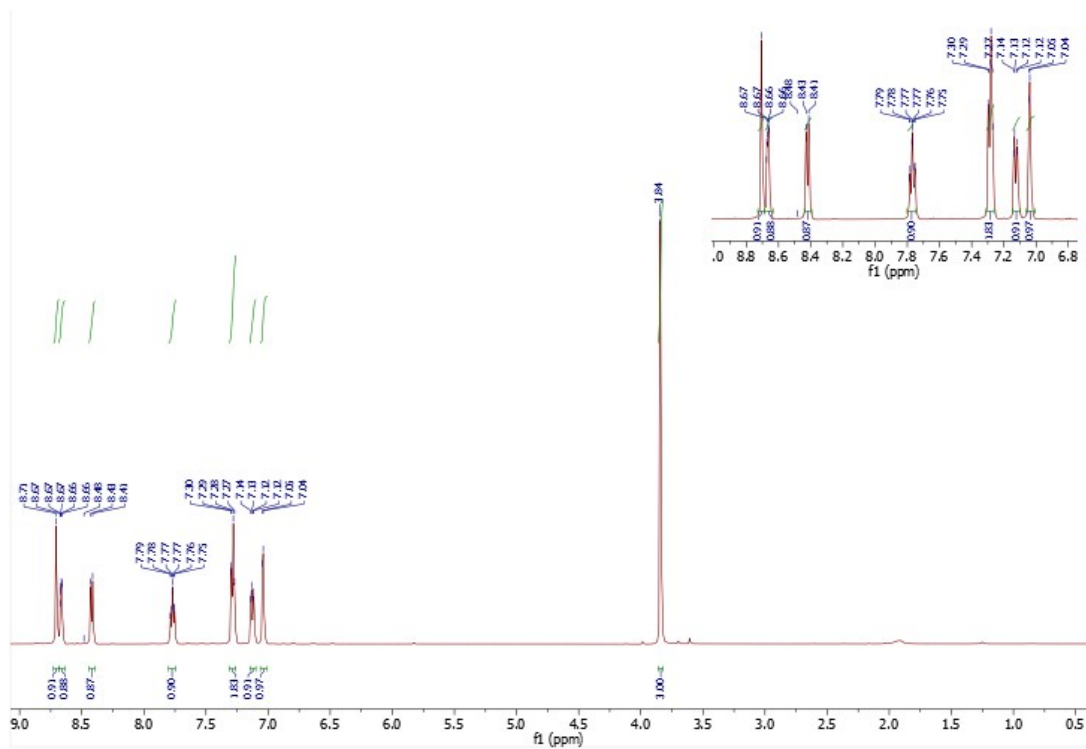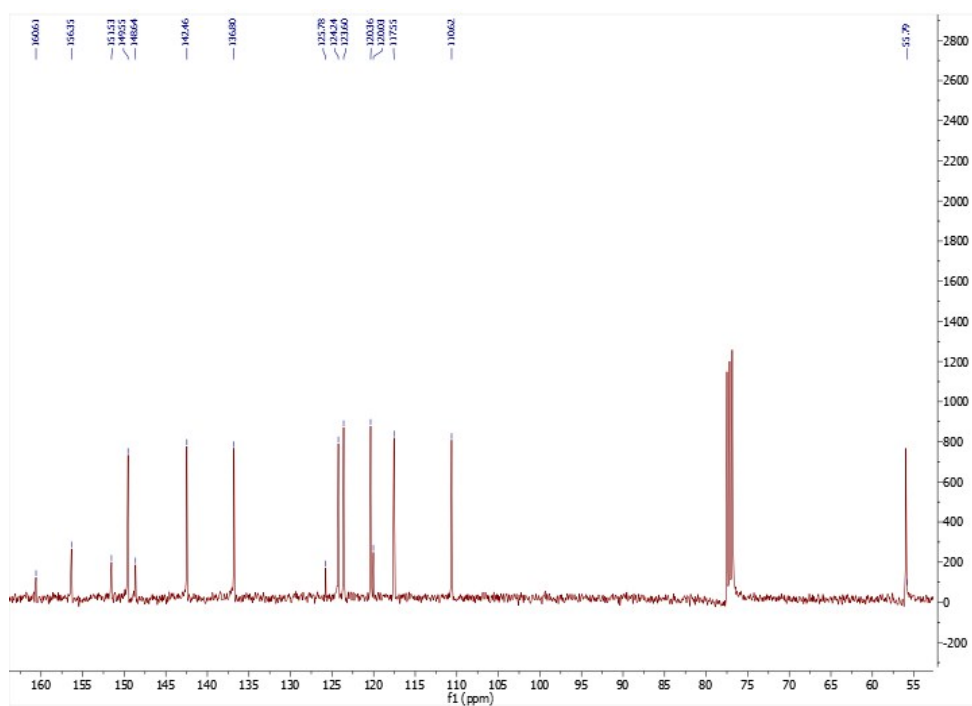

**Figure S3:**  $^1\text{H}$  NMR (top) and  $^{13}\text{C}$  NMR spectrum (bottom) of ligand L3, 6-methoxy-3-(pyridin-2-yl)-2*H*-chromen-2-one. NMR spectra were recorded on a Varian 500 spectrometer at room temperature with trimethylsilane (TMS) as internal standard in  $\text{CDCl}_3$ .

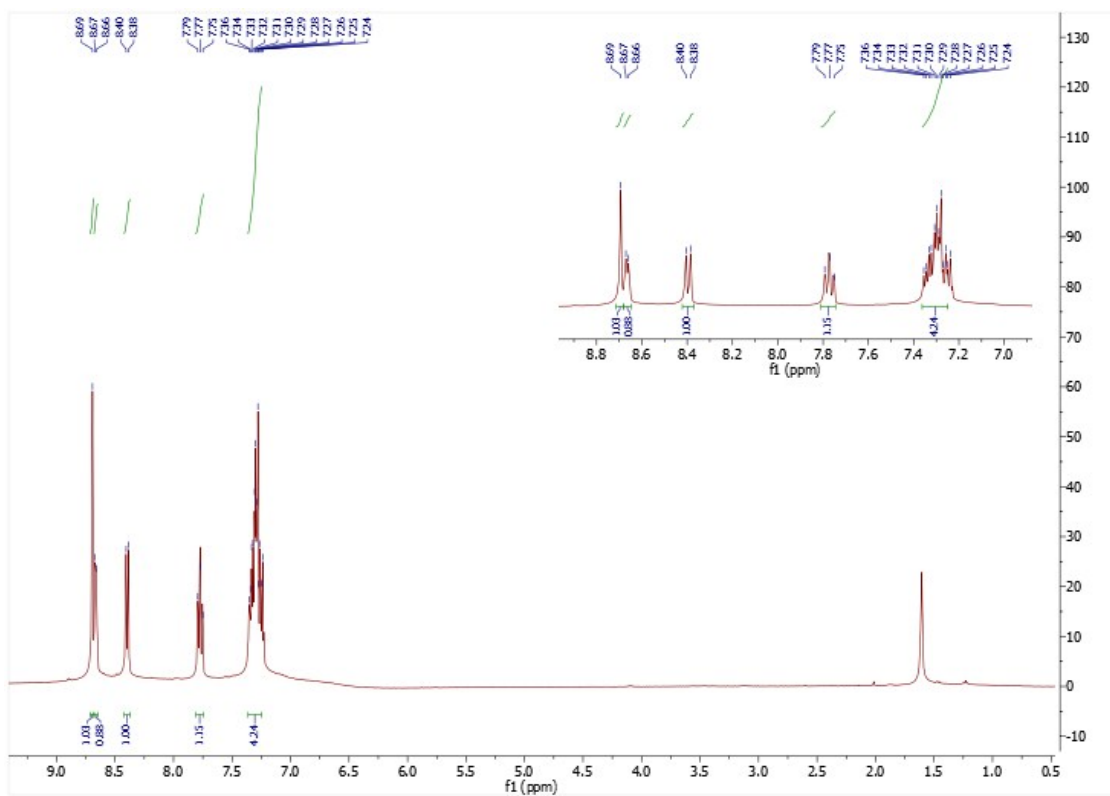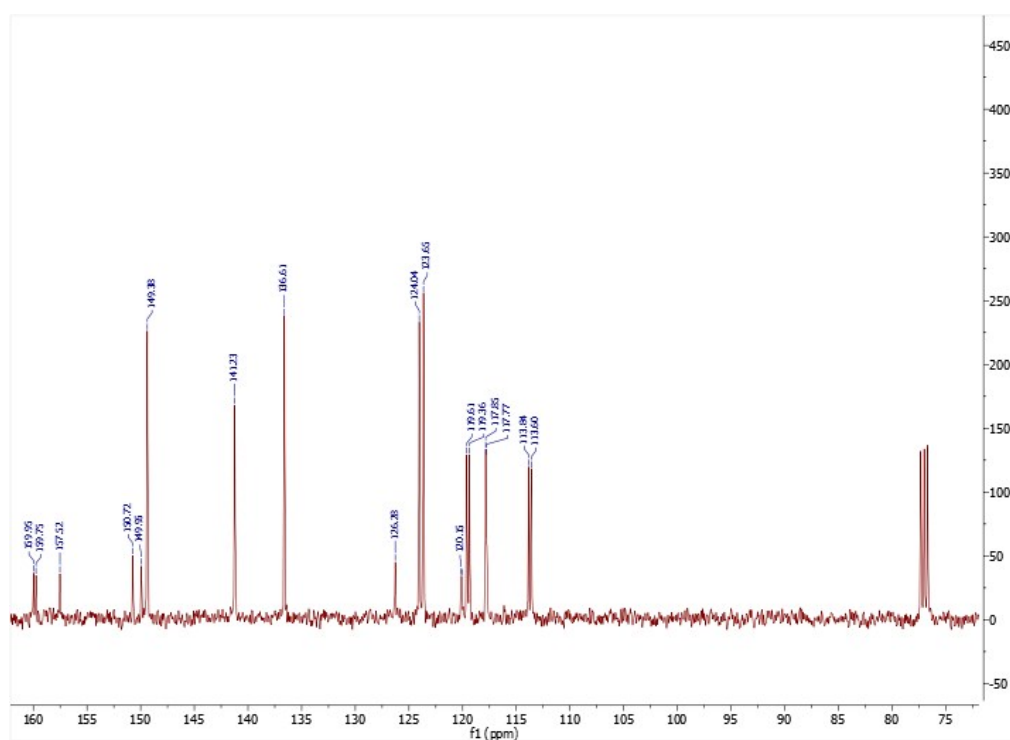

**Figure S4:**  $^1\text{H}$  NMR (top) and  $^{13}\text{C}$  NMR spectrum (bottom) of ligand L4, 6-fluoro-3-(pyridin-2-yl)-2*H*-chromen-2-one. NMR spectra were recorded on a Varian 500 spectrometer at room temperature with trimethylsilane (TMS) as internal standard in  $\text{CDCl}_3$ .

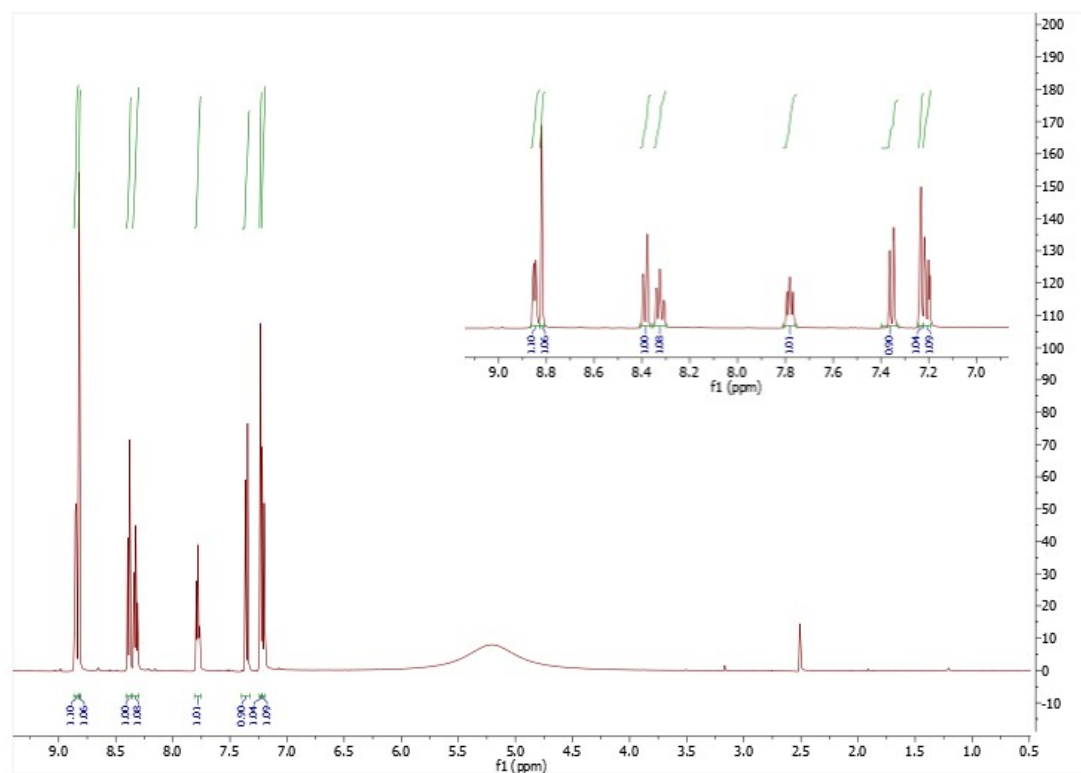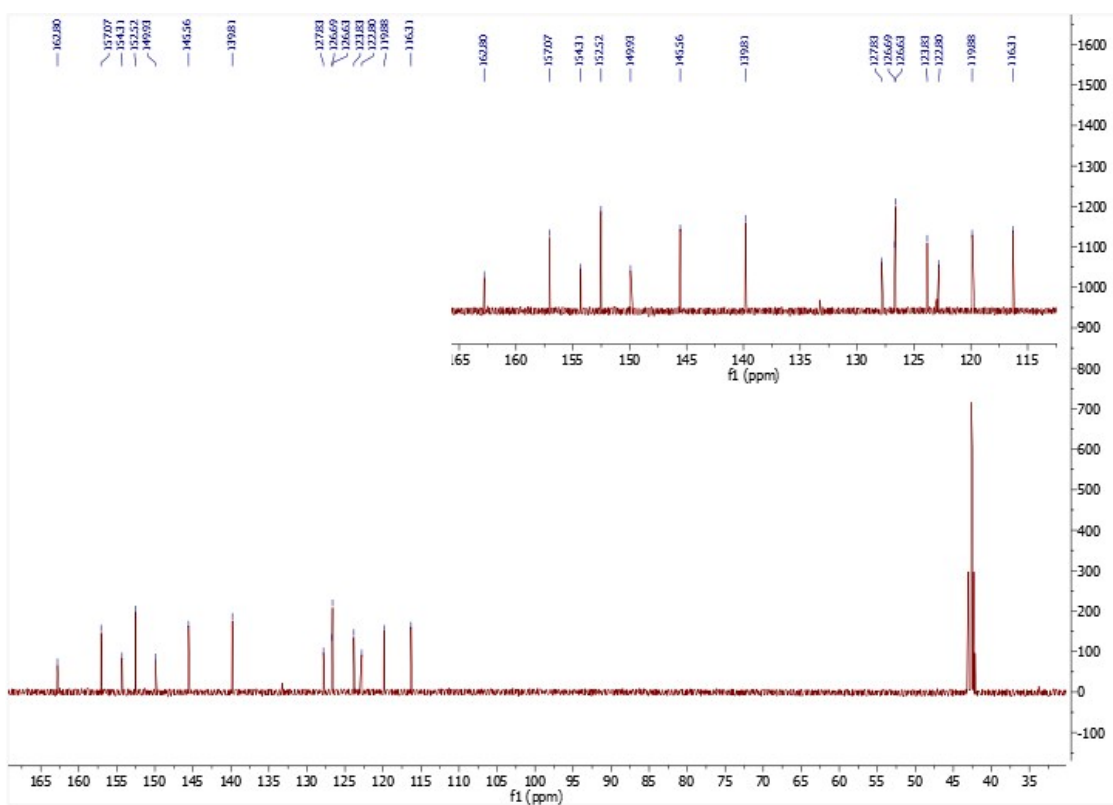

**Figure S5:**  $^1\text{H}$  NMR (top) and  $^{13}\text{C}$  NMR spectrum (bottom) of ligand L5, 6-hydroxy-3-(pyridin-2-yl)-2H-chromen-2-one. NMR spectra were recorded on a Varian 500 spectrometer at room temperature with trimethylsilane (TMS) as internal standard in DMSO.

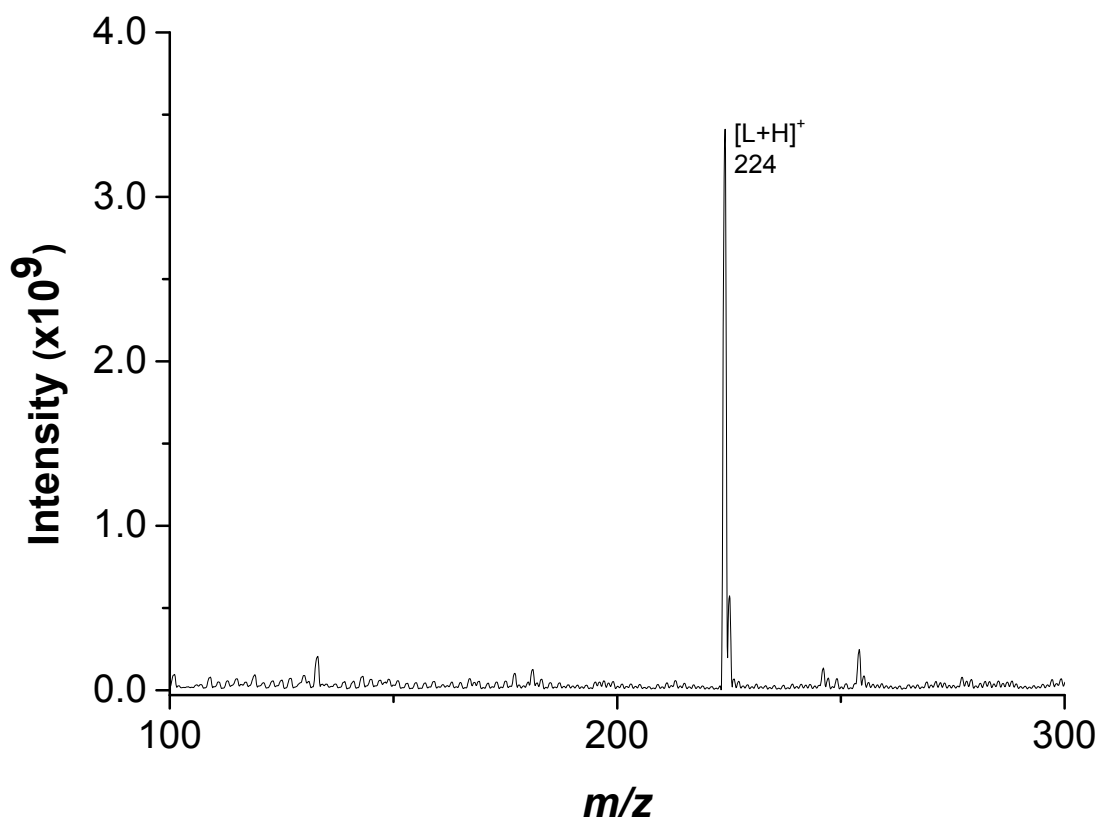

**Figure S6:** ESI-MS spectrum of ligand L1, 3-(pyridin-2-yl)-2*H*-chromen-2-one. Mass spectra were recorded on a triple quadruple QqQ Varian 310-MS mass spectrometer using electrospray ionisation (ESI) technique. The mass spectra were recorded in positive ion mode in the *m/z* 50–550 range. The experimental conditions were: needle voltage 4500 V, shield voltage 800 V, housing temperature 60 °C, drying gas temperature 150 °C, nebuliser gas pressure 40 PSI, drying gas pressure 40 PSI, and detector voltage 1650 V.

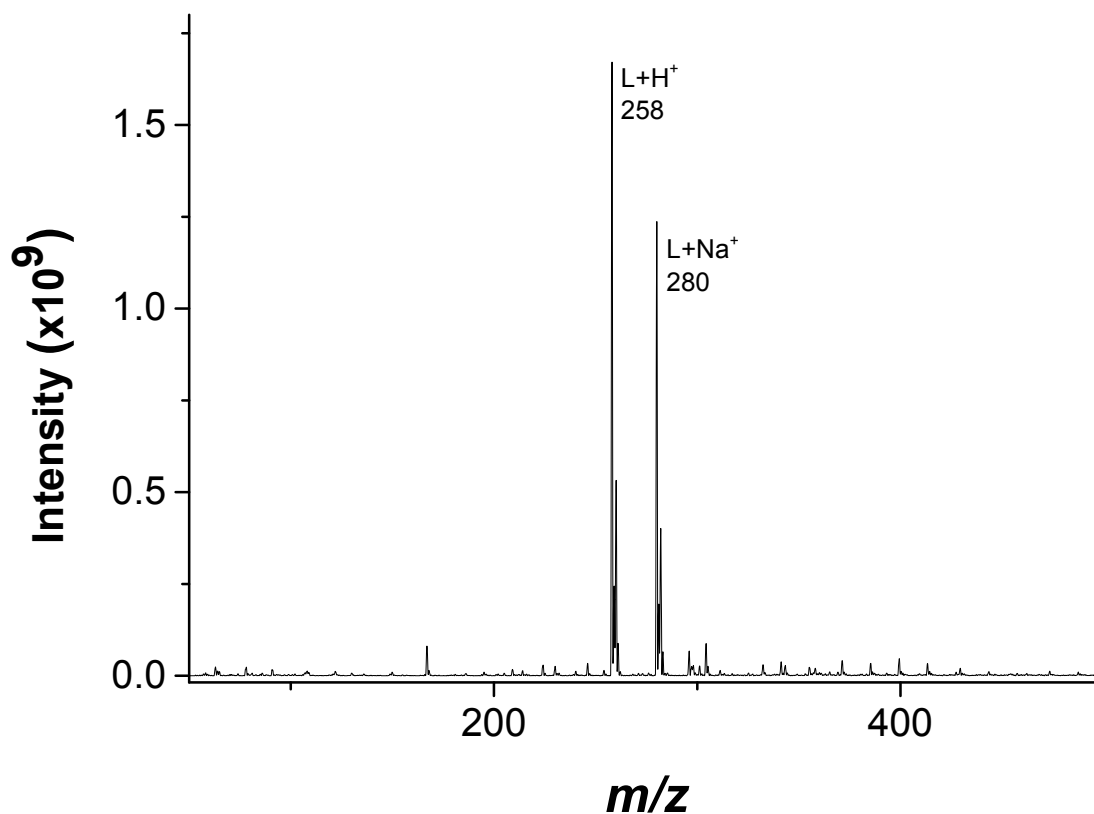

**Figure S7:** ESI-MS spectrum of ligand L2, 6-chloro-3-(pyridin-2-yl)-2*H*-chromen-2-one. Mass spectra were recorded on a triple quadrupole QqQ Varian 310-MS mass spectrometer using electrospray ionisation (ESI) technique. The mass spectra were recorded in positive ion mode in the  $m/z$  50–550 range. The experimental conditions were: needle voltage 4500 V, shield voltage 800 V, housing temperature 60 °C, drying gas temperature 150 °C, nebuliser gas pressure 40 PSI, drying gas pressure 40 PSI, and detector voltage 1650 V.



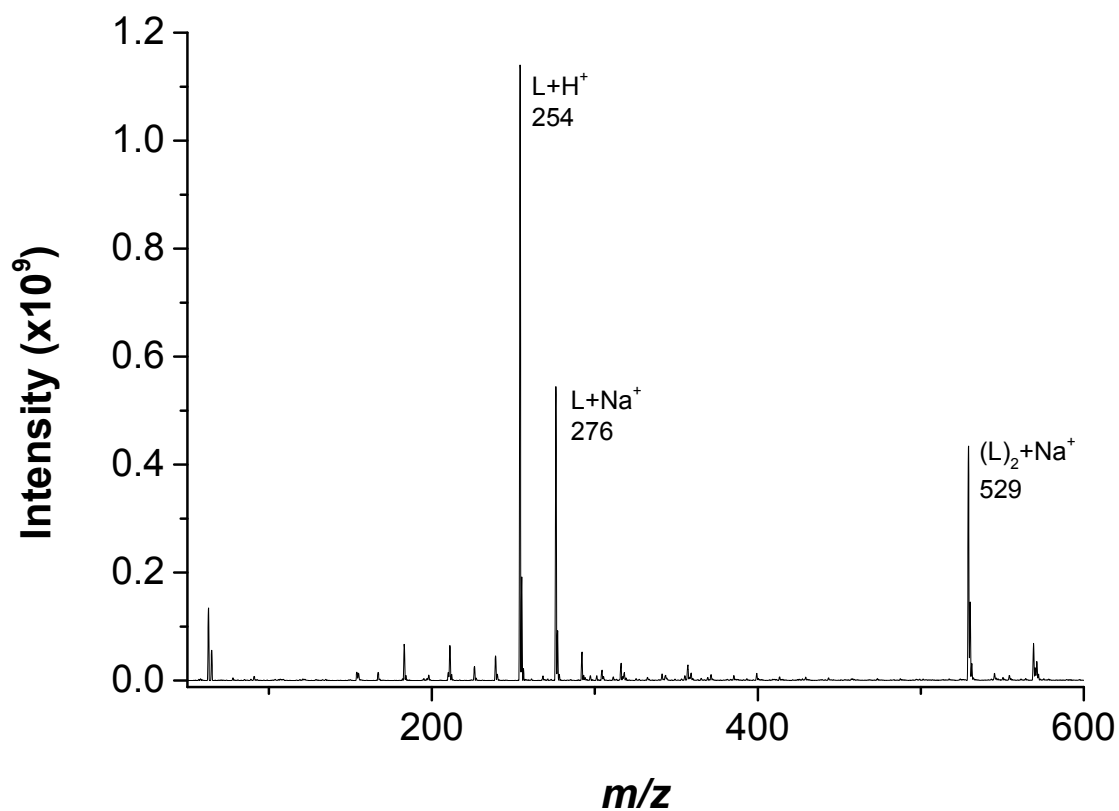

**Figure S8:** ESI-MS spectrum of ligand L3, 6-methoxy-3-(pyridin-2-yl)-2*H*-chromen-2-one. Mass spectra were recorded on a triple quadruple QqQ Varian 310-MS mass spectrometer using electrospray ionisation (ESI) technique. The mass spectra were recorded in positive ion mode in the  $m/z$  50–550 range. The experimental conditions were: needle voltage 4500 V, shield voltage 800 V, housing temperature 60 °C, drying gas temperature 150 °C, nebuliser gas pressure 40 PSI, drying gas pressure 40 PSI, and detector voltage 1650 V.

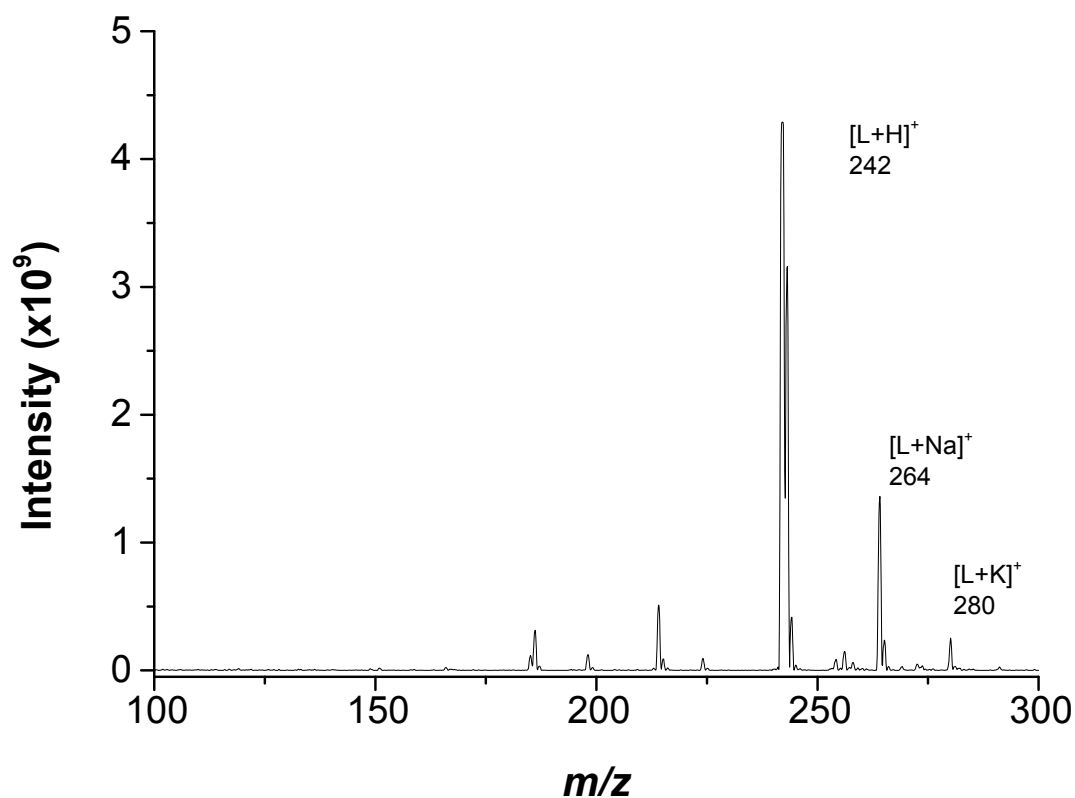

**Figure S9:** ESI-MS spectrum of ligand L4, 6-fluoro-3-(pyridin-2-yl)-2*H*-chromen-2-one. Mass spectra were recorded on a triple quadrupole QqQ Varian 310-MS mass spectrometer using electrospray ionisation (ESI) technique. The mass spectra were recorded in positive ion mode in the  $m/z$  50–550 range. The experimental conditions were: needle voltage 4500 V, shield voltage 800 V, housing temperature 60 °C, drying gas temperature 150 °C, nebuliser gas pressure 40 PSI, drying gas pressure 40 PSI, and detector voltage 1650 V.

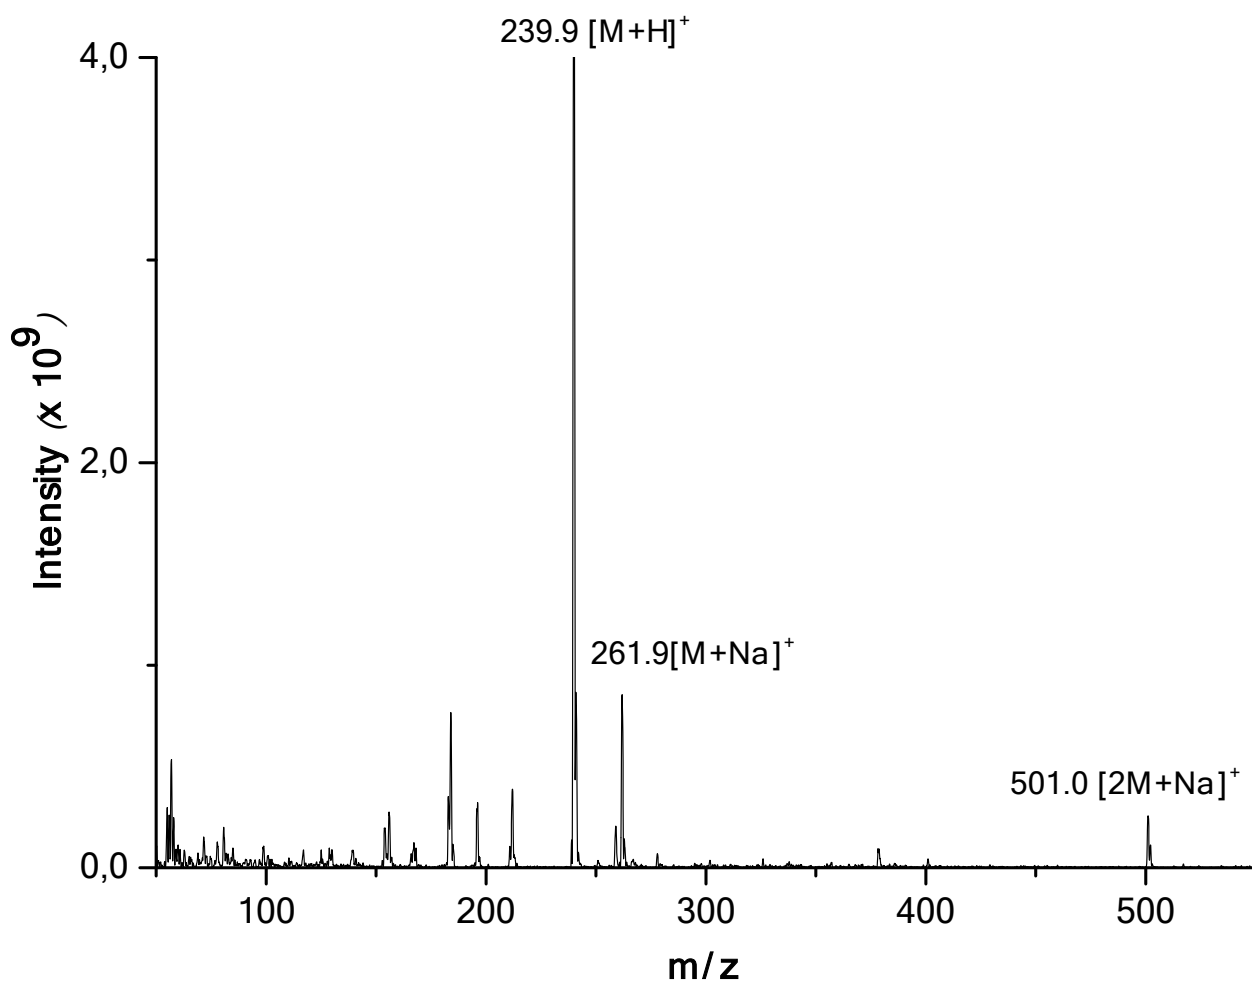

**Figure S10:** ESI-MS spectrum of ligand L5, 6-Hydroxy-3-(pyridin-2-yl)-2*H*-chromen-2-one. Mass spectra were recorded on a triple quadruple QqQ Varian 310-MS mass spectrometer using electrospray ionisation (ESI) technique. The mass spectra were recorded in positive ion mode in the  $m/z$  50–550 range. The experimental conditions were: needle voltage 4500 V, shield voltage 800 V, housing temperature 60 °C, drying gas temperature 150 °C, nebuliser gas pressure 40 PSI, drying gas pressure 40 PSI, and detector voltage 1650 V.

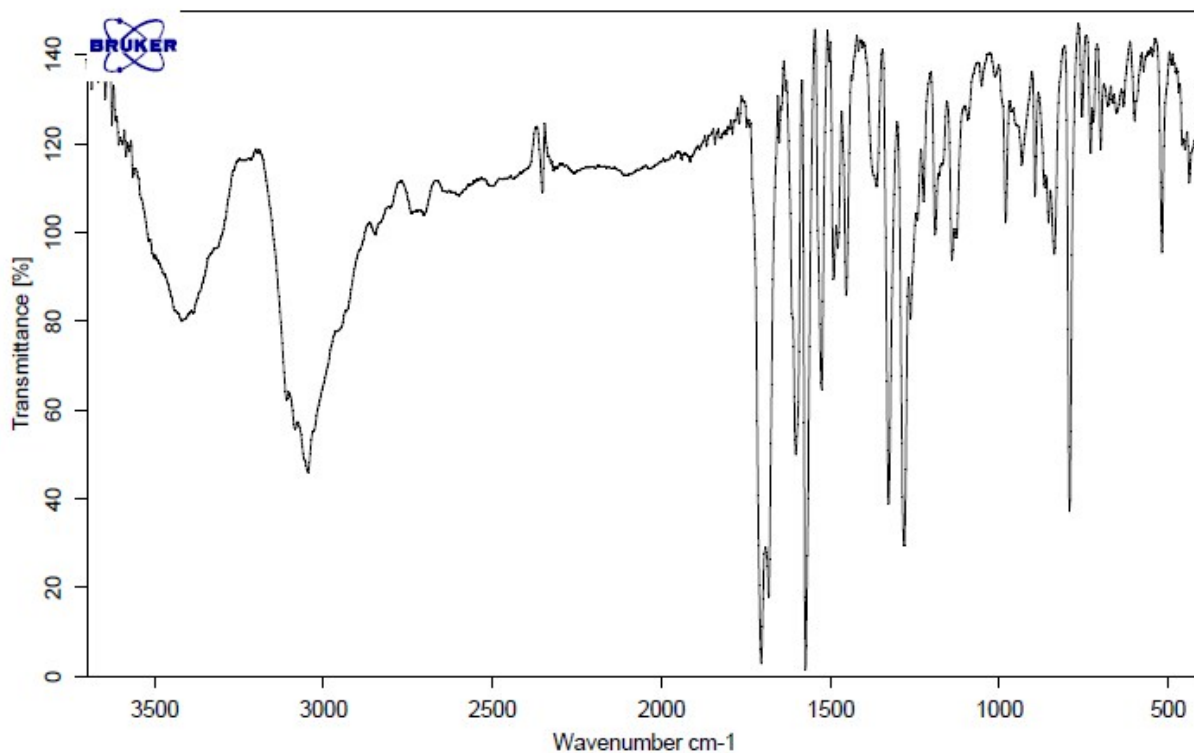

**Figure S11:** IR spectrum of ligand L5, 6-Hydroxy-3-(pyridin-2-yl)-2*H*-chromen-2-one. IR spectra were acquired with a Bruker Vector 22 spectrophotometer, preparing the samples as KBr pellets.

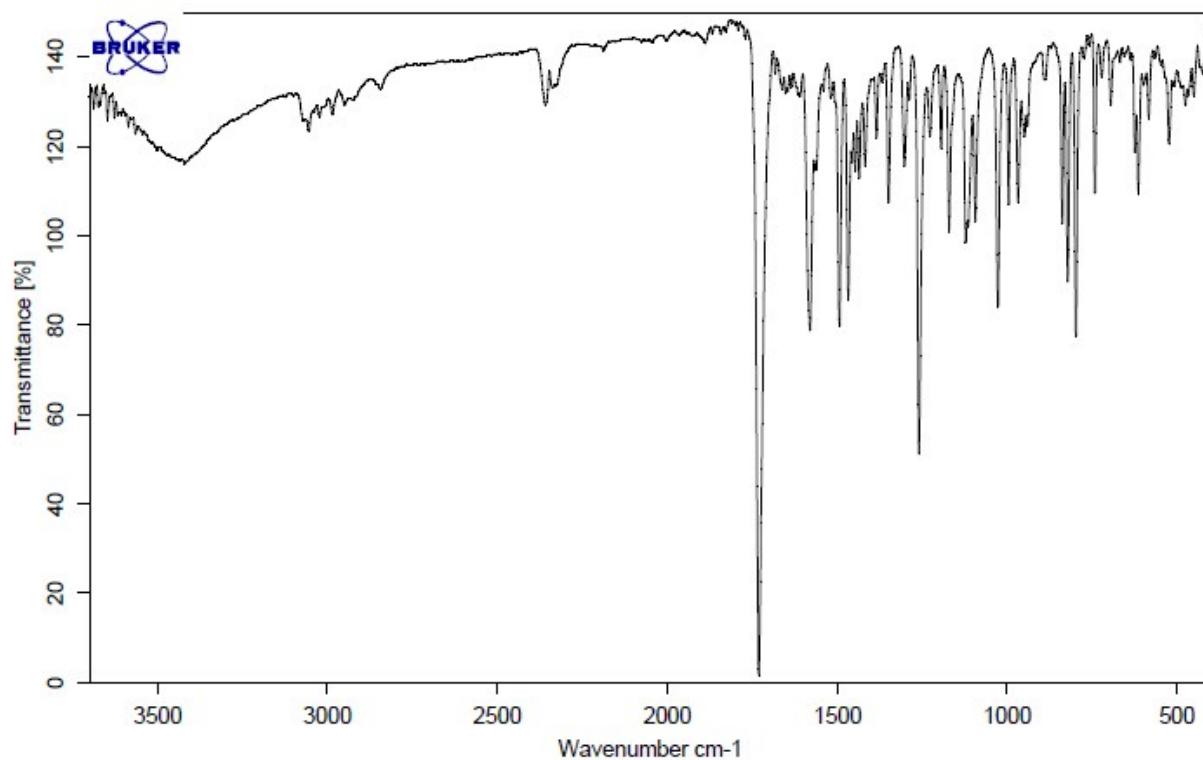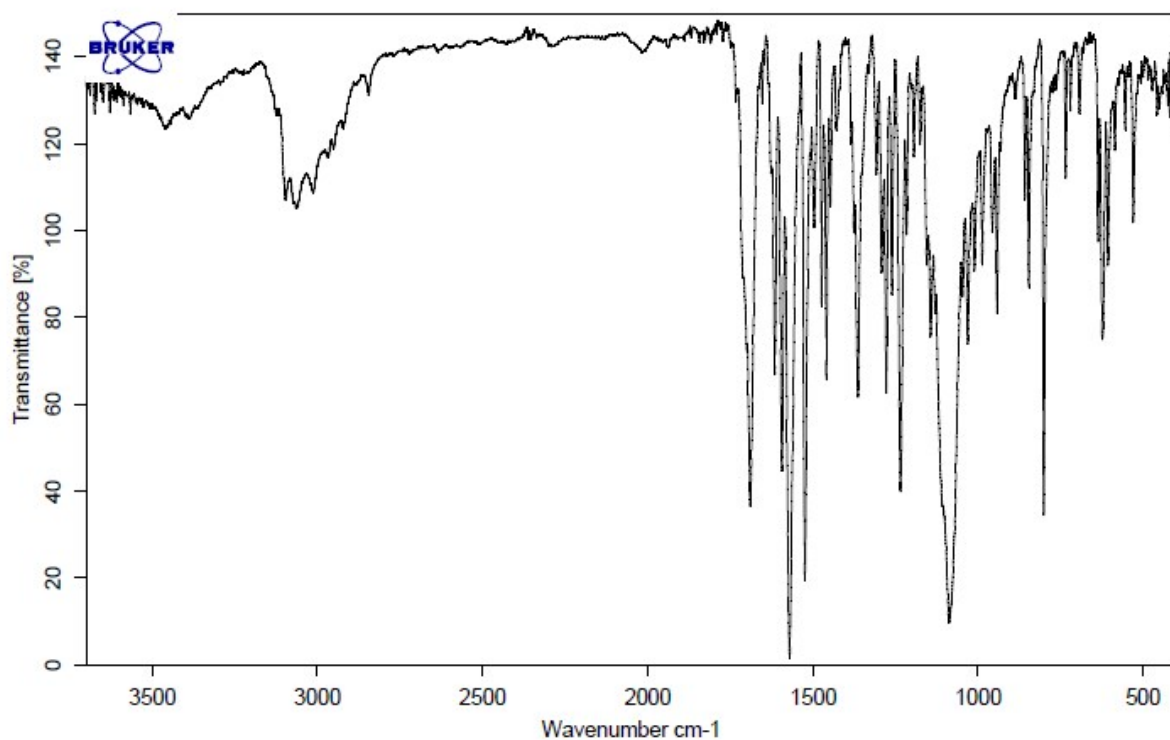

**Figure S12:** IR spectrum of ligand L3 (up), 6-Methoxy-3-(pyridin-2-yl)-2*H*-chromen-2-one and C8, Fe(L3)<sub>3</sub>(ClO<sub>4</sub>)<sub>3</sub>. (bottom). IR spectra were acquired with a Bruker Vector 22 spectrophotometer, preparing the samples as KBr pellets.

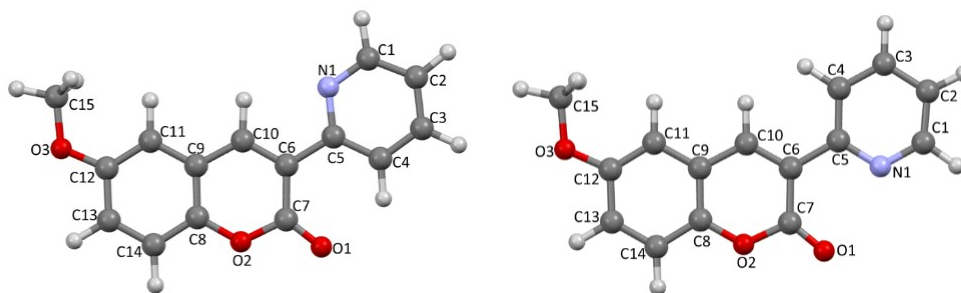

**Figure S13.** Molecular drawings and atom labelling schemes for **L3** in antiperiplanar (right) and periplanar (left) conformations at the DFT-optimized geometries (data are reported in Table S1)

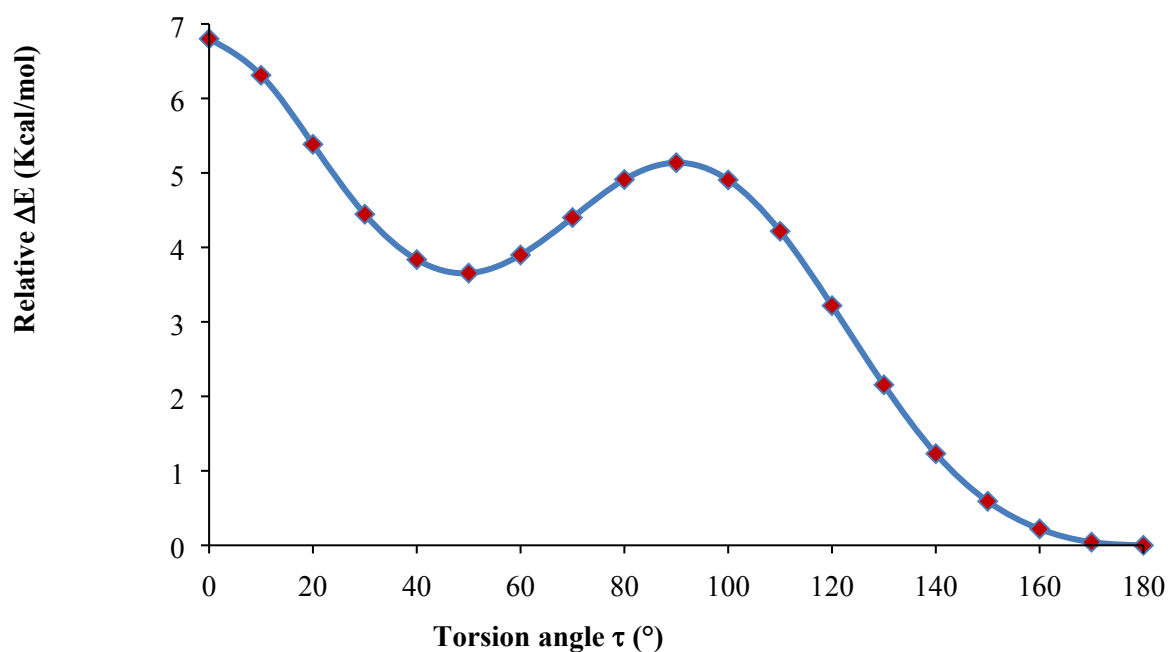

**Fig. S14.** Relative variation  $\Delta E$  of the total electronic energy as a function of torsion angle  $\tau$  (C7–C6–C5–N1 dihedral) calculated for **L3** at the DFT level.

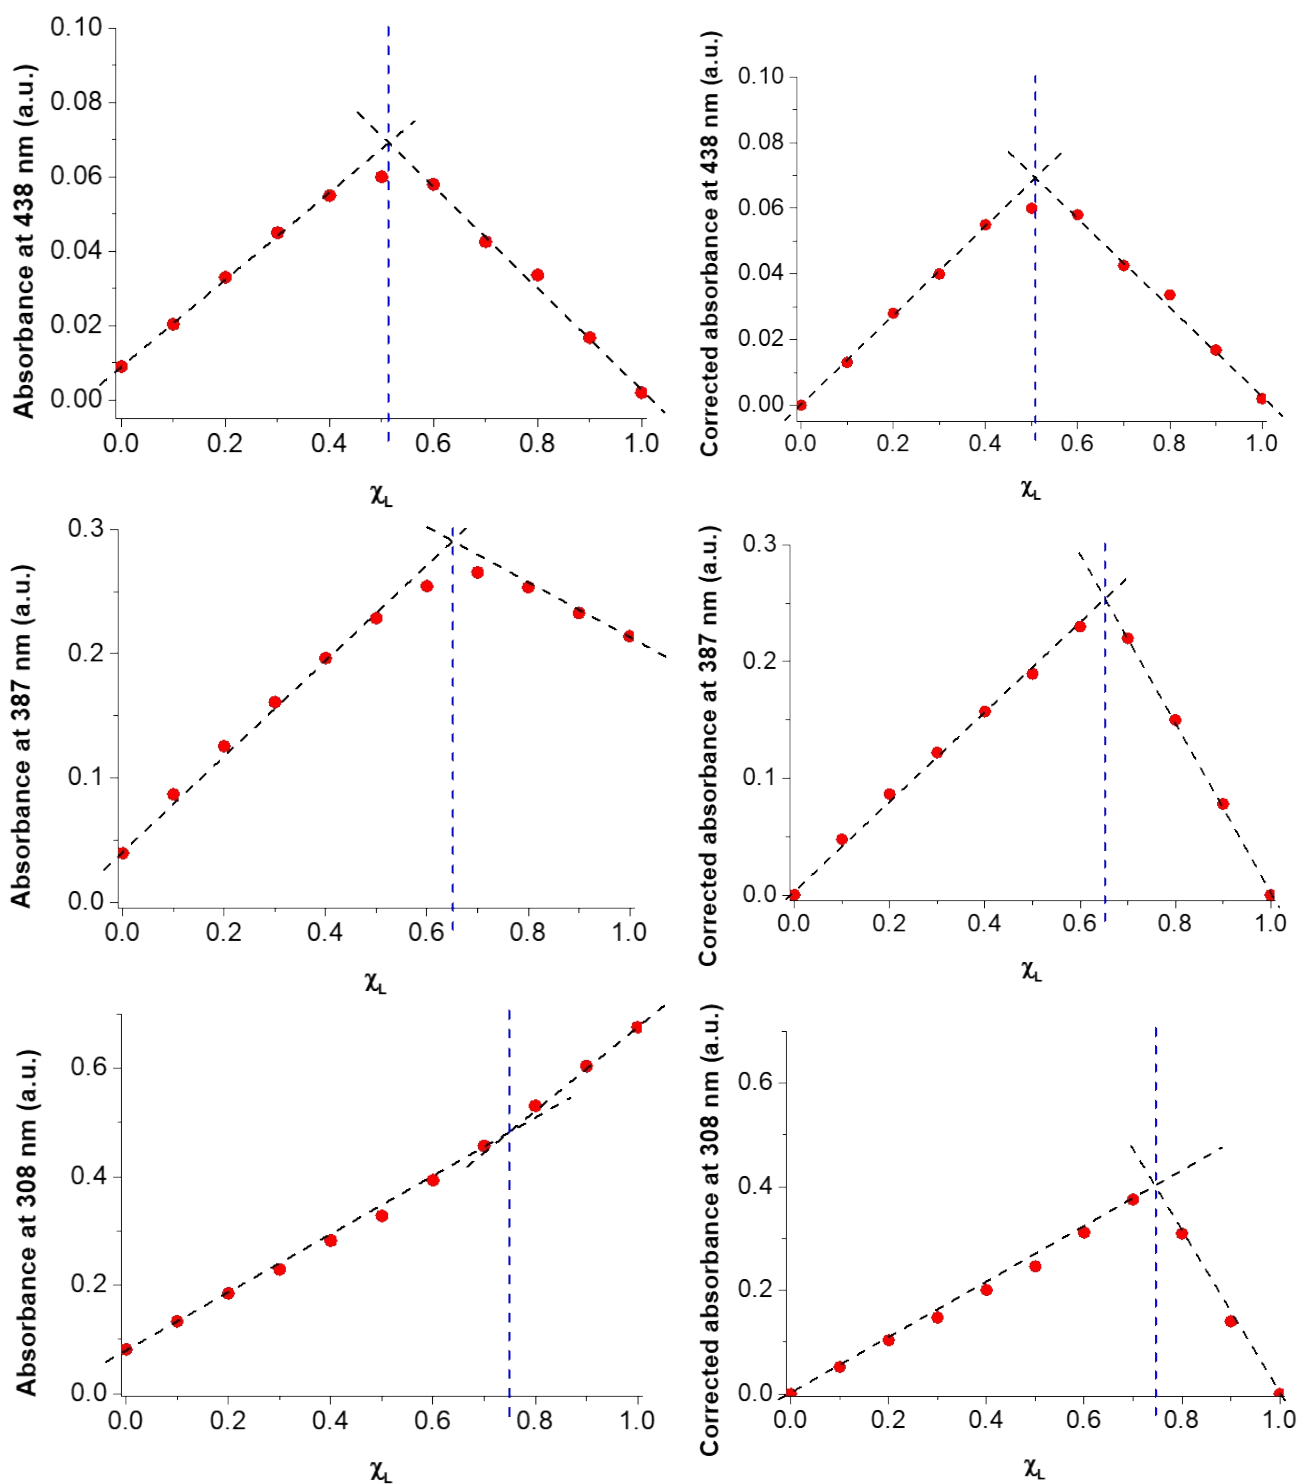

**Figure S15.** Job's plot for the system Fe(III)-L3. Uncorrected (left) and corrected (right) absorbances measured at different ligand:metal molar ratio at 438, 387 and 308 nm (concentration of Fe(III) = L =  $5.27 \cdot 10^{-5}$  M, 0.01M NaClO<sub>4</sub>, T 25°C, optic path length 1 cm).

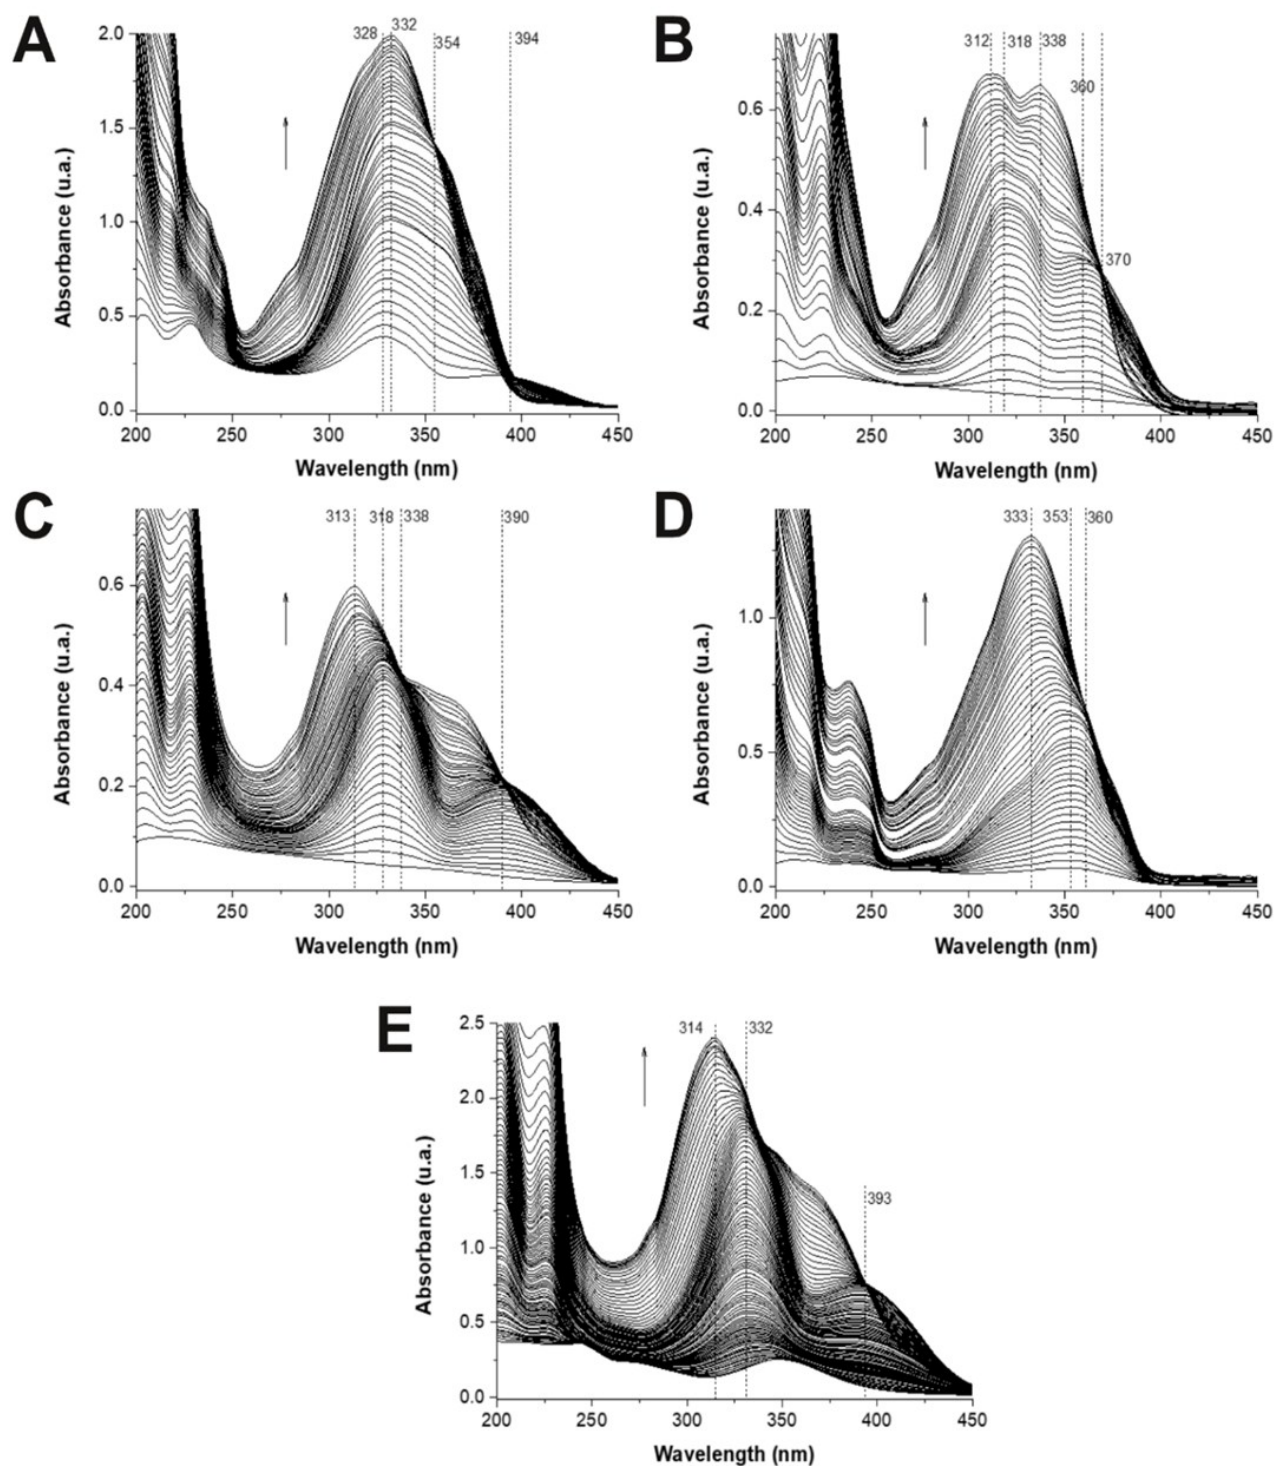

**Figure S16.** Selected spectra collected during the spectrophotometric titration of Fe(III) with **L1** (A) (Fe(III)  $8.4 \cdot 10^{-5}$  mmoles, L  $4.2 \cdot 10^{-5}$  M), **L2** (B) (Fe(III)  $4.6 \cdot 10^{-5}$  mmoles, L  $4.5 \cdot 10^{-5}$  M), **L3** (C) (Fe(III)  $4.6 \cdot 10^{-5}$  mmoles, L  $4.3 \cdot 10^{-5}$  M), **L4** (D) (Fe(III)  $4.6 \cdot 10^{-5}$  mmoles, L  $4.5 \cdot 10^{-5}$  M), **L5** (E) (Fe(III)  $5.7 \cdot 10^{-5}$  mmoles, L  $4.6 \cdot 10^{-5}$  M); NaClO<sub>4</sub> 0.05 M ionic strength buffer, 1 cm optical path length, 25 °C, CH<sub>3</sub>CN solution.



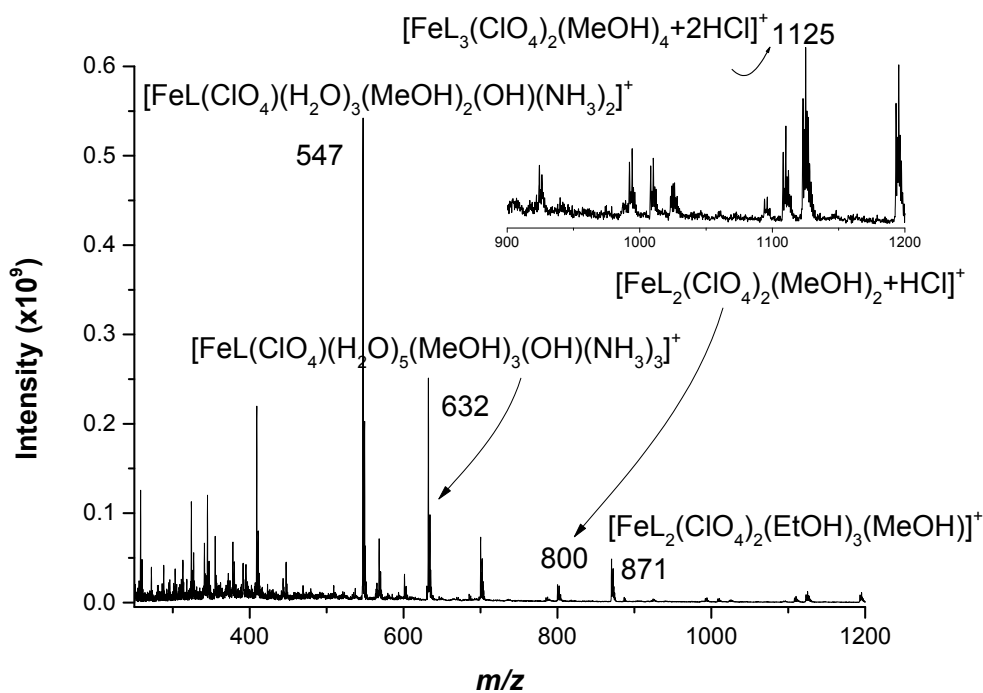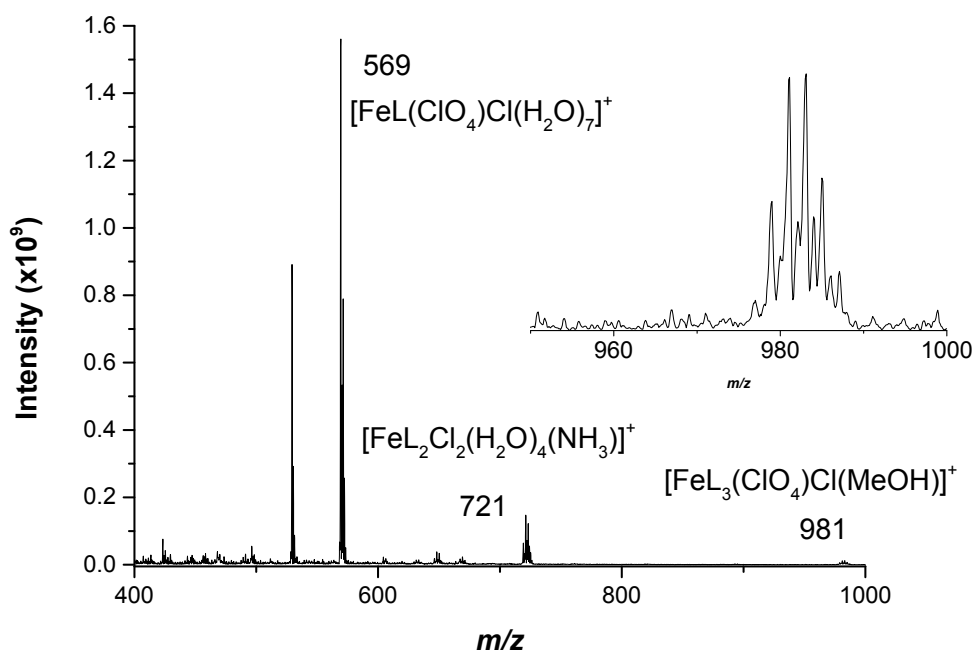

**Figure S17.** ESI mass spectra of solution containing Fe(III) and L1 (up) or L3 (down) in 1:3 metal:ligand molar ratio. Several adducts with solvent were evidenced. The stoichiometry was proposed on the basis of the fitting of the isotopic pattern and on MS-MS experiments (Fe(III) 1mM, H<sub>2</sub>O:MeOH:EtOH 50:40:10).

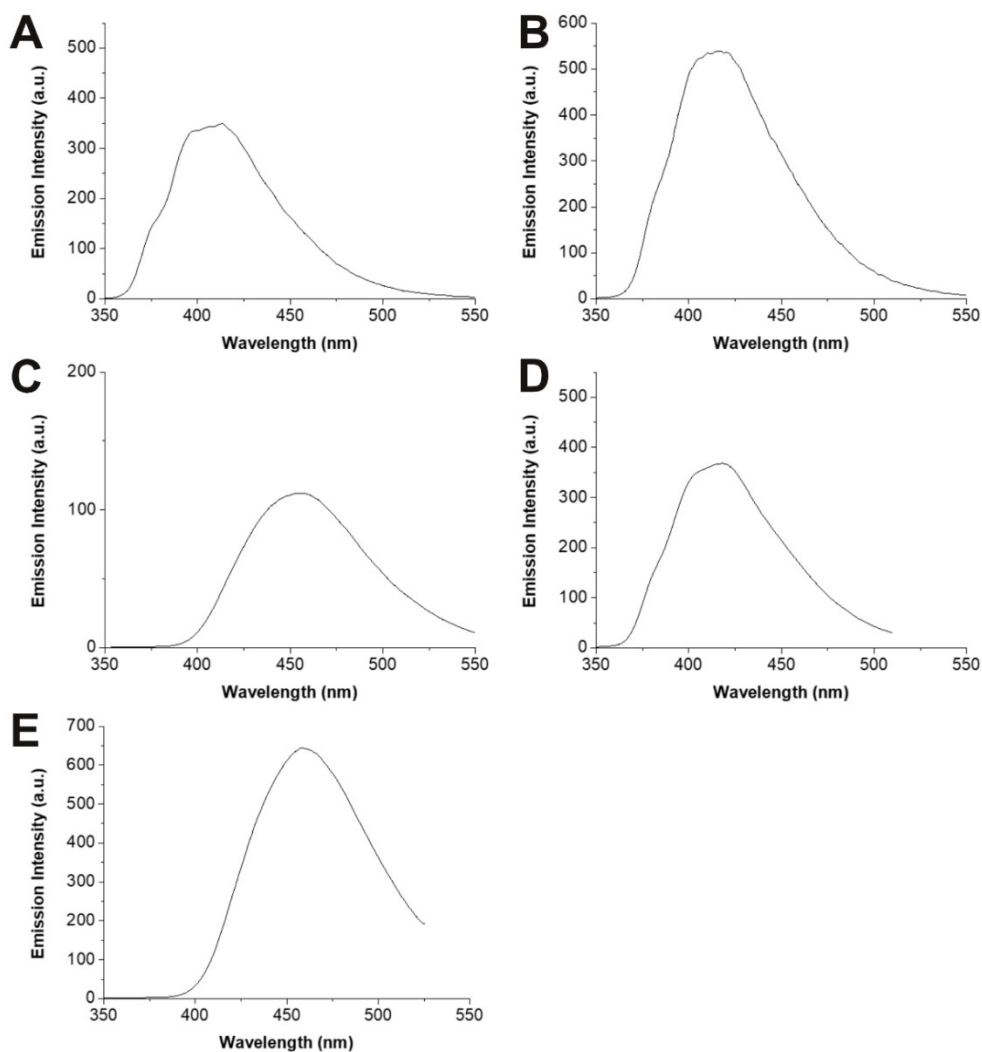

**Figure S18.** Fluorescence emission spectra of L1-L5 in  $\text{CH}_3\text{CN}$  solution (concentration  $6.7 \cdot 10^{-5}$  mmol, quinine sulphate as reference,  $25^\circ\text{C}$ ), (A) **L1**  $\lambda_{\text{exc}}$  309 nm, slits  $2.5 \times 2.5$  nm, PMT 600V,  $\Phi$  0.0820; (B) **L2**  $\lambda_{\text{exc}}$  301 nm, slits  $5.0 \times 5.0$  nm, PMT 600V,  $\Phi$  0.0322; (C) **L3**  $\lambda_{\text{exc}}$  310 nm, slits  $2.5 \times 5.0$  nm, PMT 600V,  $\Phi$  0.0310; (D) **L4**  $\lambda_{\text{exc}}$  261 nm, slits  $5.0 \times 2.5$  nm, PMT 600V,  $\Phi$  0.342; (E) **L5**  $\lambda_{\text{exc}}$  267 nm, slits  $5.0 \times 5.0$  nm, PMT 650 V,  $\Phi$  0.0266.

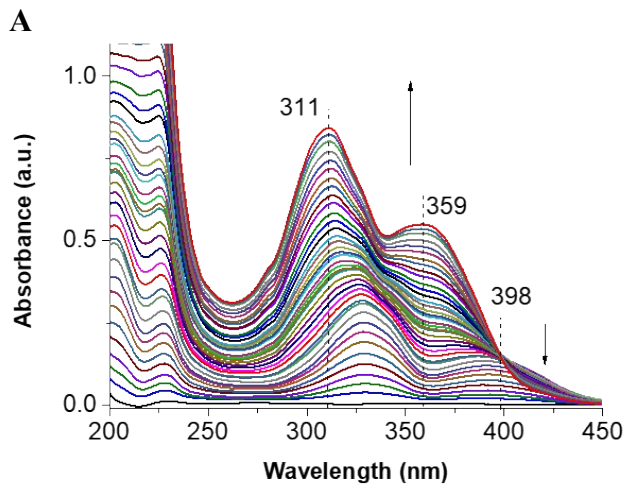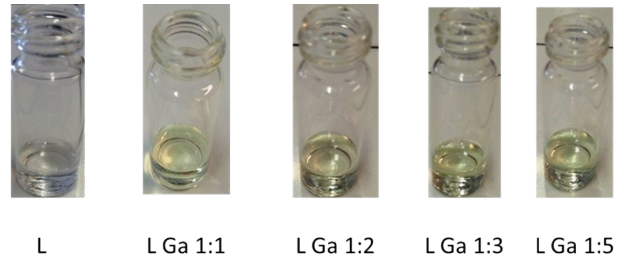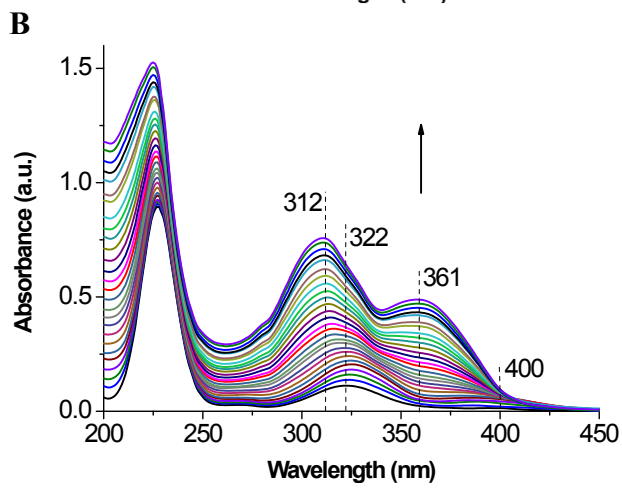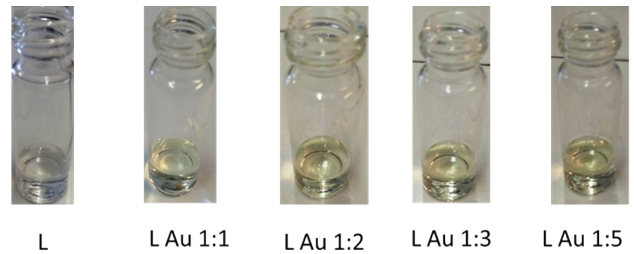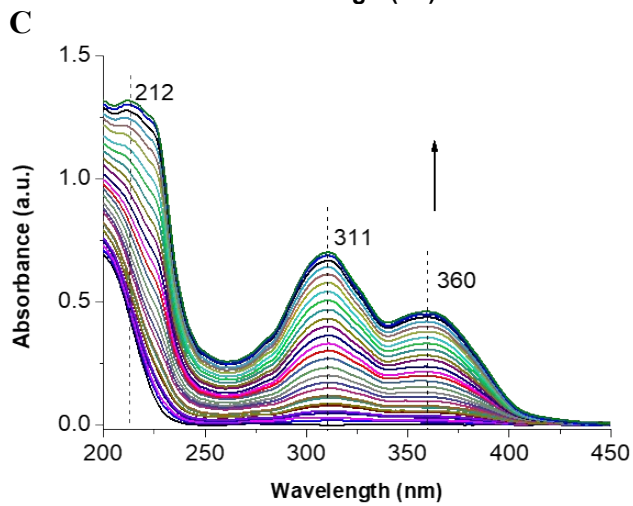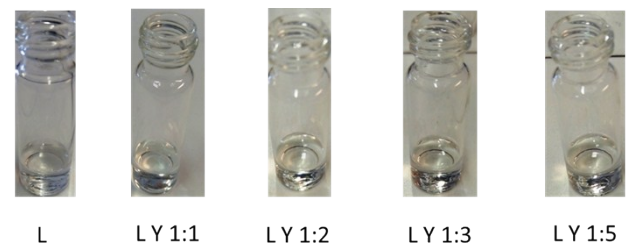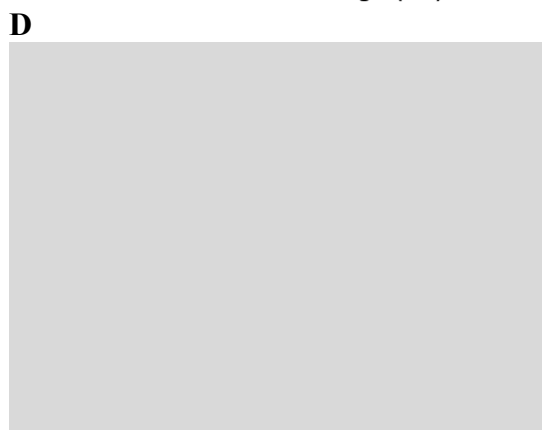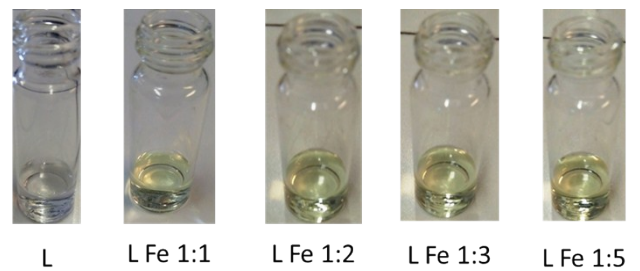

**Figure S19.** Selected spectra collected during the spectrophotometric titration of Ga(III) with **L3** **(A)** (Ga(III)  $5.2 \cdot 10^{-5}$  mmol, L  $6.7 \cdot 10^{-5}$  M), Au(III) with **L3** **(B)** (Au(III)  $5.2 \cdot 10^{-5}$  mmol, L  $6.7 \cdot 10^{-5}$  M) and Y(III) with **L3** **(C)** (Y(III)  $5.3 \cdot 10^{-5}$  mmol, L  $6.7 \cdot 10^{-5}$  M) ; NaClO<sub>4</sub> 0.05 M ionic strength buffer, 1 cm optical path length, 25 °C, CH<sub>3</sub>CN solution. In the left, solutions containing ligand and metal at different molar ratios are shown to evidence the colorimetric response of the sensor. In **D** the spectrophotometrical titration of Fe(III) with **L1** is recalled for comparison.

**Ga(III)-L3:** by adding increasing amount of the ligand, the progressive formation of a band centred at 311 nm and a shoulder at 359 nm was observed. In addition, an isosbestic point at 398 nm was evidenced.

**Au(III)-L3:** the absorption maxima of Au(III) at 322 nm was gradually shifted at 312 nm by ligand addition. The presence of a shoulder at 361 nm and an isosbestic point at 400 nm were also put into evidence.

**Y(III)-L3:** solvated cationic core of the metal ion was progressively altered during ligand addition, as evidenced by absorption maxima shift from 200 nm to 212 nm, along with the formation of a band at 311 nm and a shoulder at 360 nm.

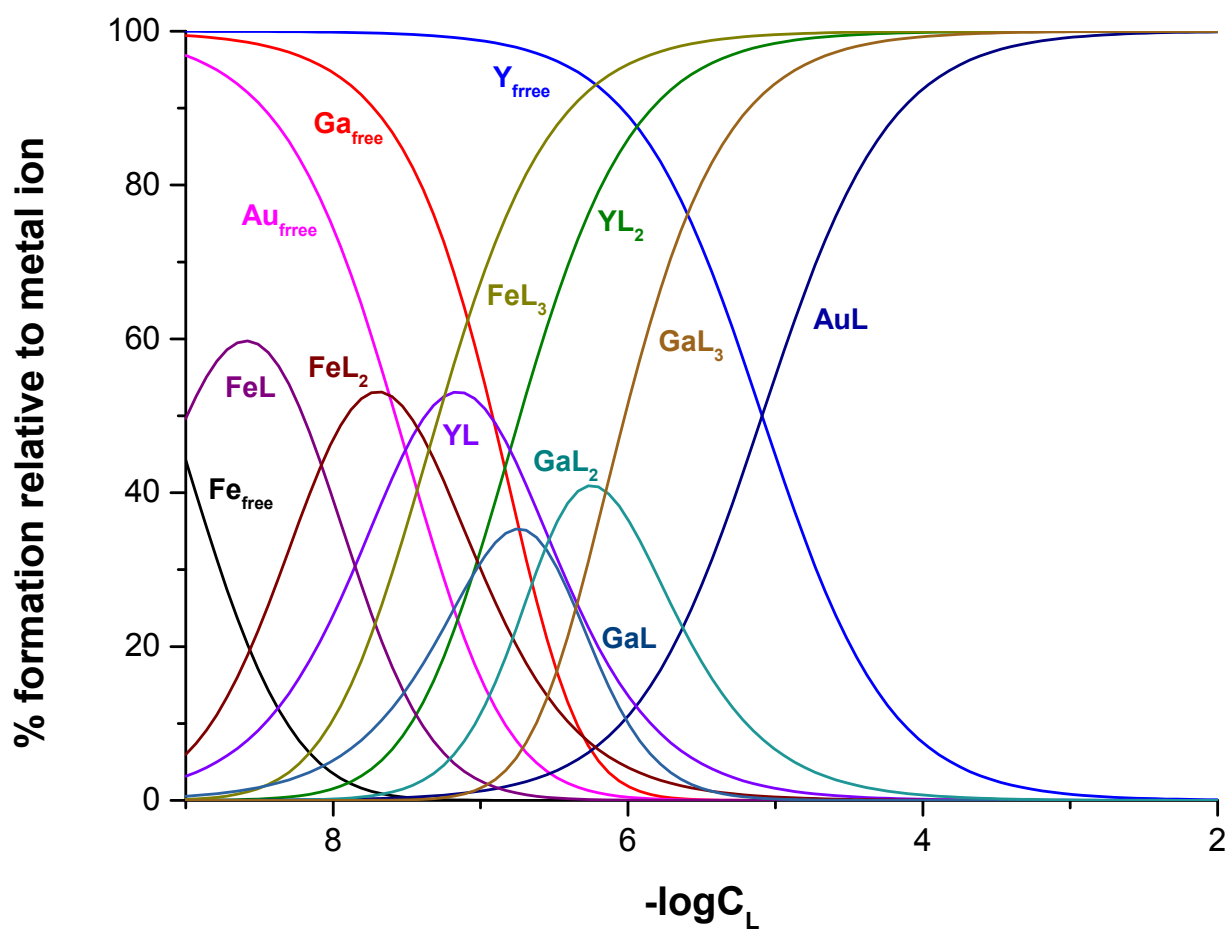

**Figure S20.** Calculated distribution curves for the **L3**-Fe(III)-Ga(III)-Au(III)-Y(III) system as a function of the minus logarithm of the **L3** concentration when Fe(III) is  $1 \cdot 10^{-6}$  M and the other metal ions are  $1 \cdot 10^{-5}$  M (L is **L3**)

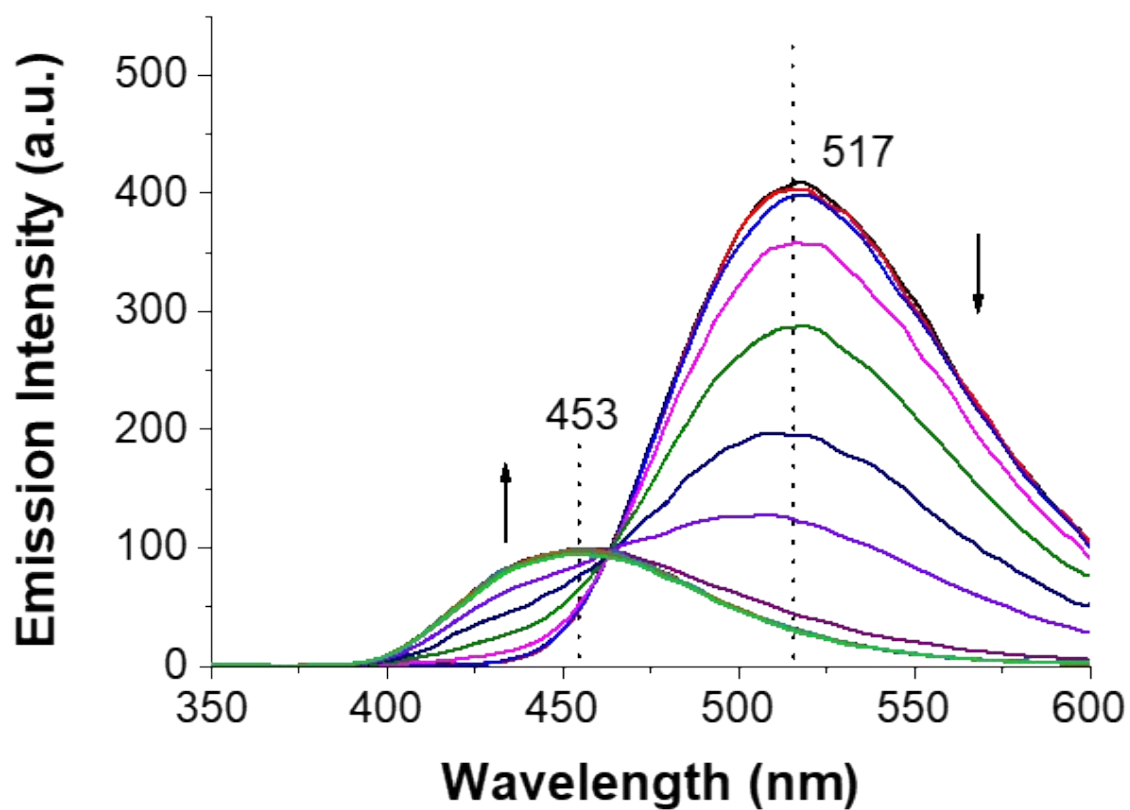

**Figure S21** Selected emission spectra collected during the titration of a  $\text{CH}_3\text{CN}$  solution containing L3 ( $6.7 \cdot 10^{-5}$  mmol) and Fe(III) in 1:1 molar ratio with EDTA ( $2.48 \cdot 10^{-3}$  M), T 25 °C, 1 cm optical path length,  $\lambda_{\text{exc}}$  310 nm, slits  $2.5 \times 5.0$  nm , PMT 600V.

---

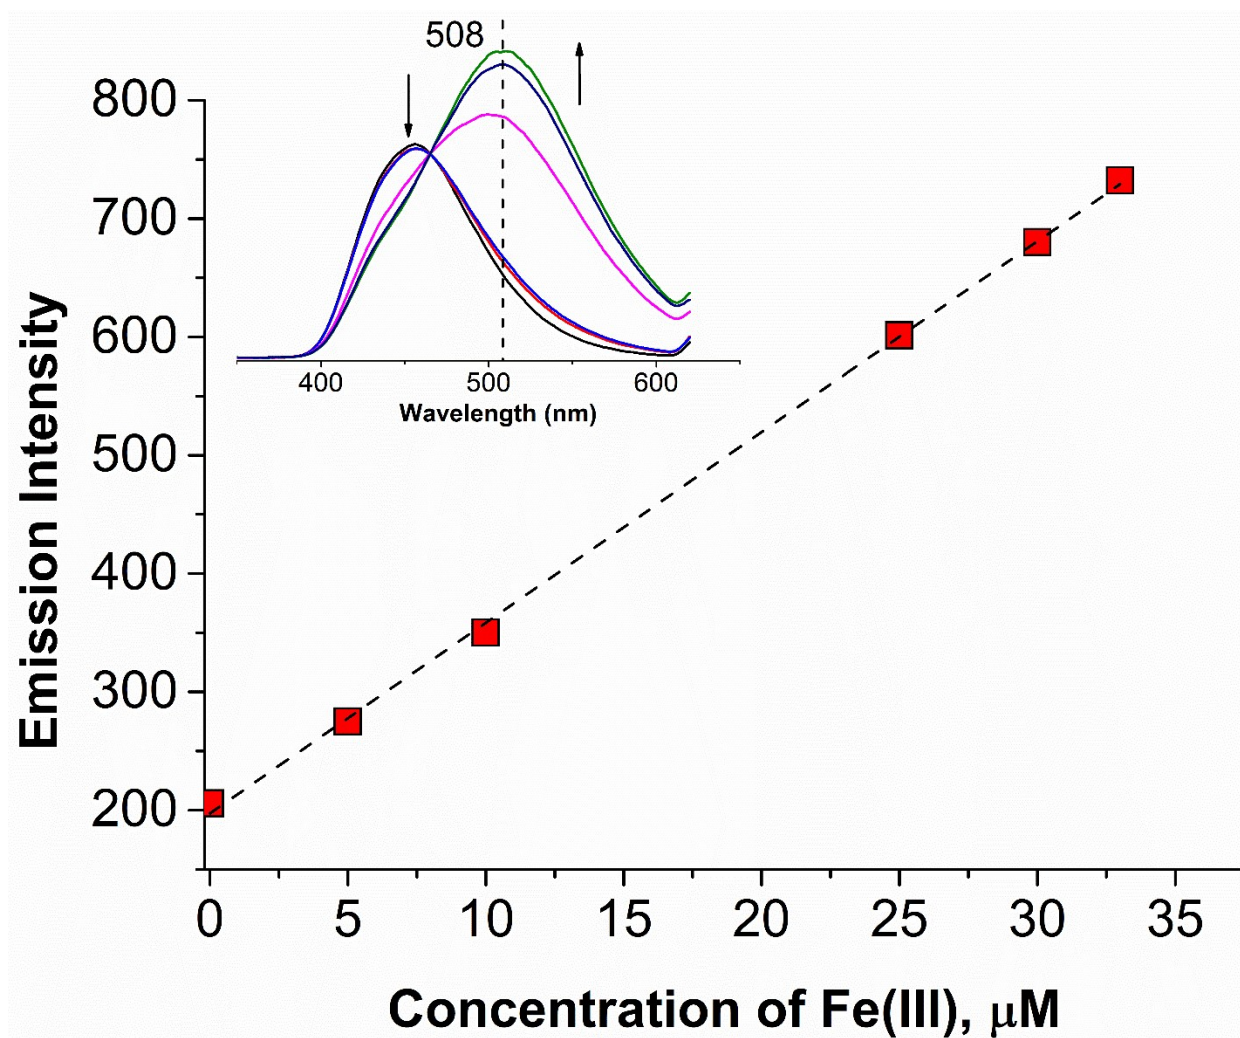

**Figure S22.** Linear response between emission intensity measured at 508 nm and the analytical Fe(III) concentration (**L3** concentration 35  $\mu\text{M}$ , 1:1  $\text{H}_2\text{O}$ :  $\text{CH}_3\text{CN}$  solution, T 25  $^\circ\text{C}$ , 1 cm optical path length,  $\lambda_{\text{exc}}$  310 nm, slits  $2.5 \times 5.0$  nm, PMT 600V, slits  $2.5 \times 5.0$  nm).  $Y_{508\text{nm}} = 15.1(1)X + 203(2)$ ,  $R^2 = 0.9999$ . In the onset, the emission of **L3** and **L3** with Fe (III) in different molar ratios are reported to show the positions of the maxima.

**Table S1.** Selected optimized bond distances (Å) and angles (°) for the antiperiplanar and periplanar conformations of **L3** in acetonitrile (IEF-PCM SCRF model), and corresponding structural data for **L3**. Atom labelling scheme as in Figure S13.

| <b>L3</b>      |                       |                    |            |
|----------------|-----------------------|--------------------|------------|
|                | Structural parameters | Optimized geometry |            |
|                |                       | Antiperiplanar     | Periplanar |
| C8-O2          | 1.382                 | 1.352              | 1.348      |
| O2-C7          | 1.368                 | 1.368              | 1.379      |
| C7-O1          | 1.201                 | 1.209              | 1.201      |
| C7-C6          | 1.483                 | 1.469              | 1.480      |
| C6-C5          | 1.474                 | 1.487              | 1.490      |
| C5-N1          | 1.331                 | 1.342              | 1.337      |
| N1-C1          | 1.330                 | 1.325              | 1.329      |
| C12-O3         | 1.369                 | 1.345              | 1.346      |
| C13-O3         | /                     | /                  | /          |
| O3-C15         | 1.423                 | 1.407              | 1.407      |
| C8-O2-C7       | 123.29                | 124.76             | 125.40     |
| O2-C7-C6       | 117.09                | 116.38             | 115.87     |
| O2-C7-O1       | 116.64                | 116.23             | 115.62     |
| C7-C6-C5       | 119.79                | 121.69             | 120.82     |
| C6-C5-N1       | 114.51                | 115.29             | 118.55     |
| C5-N1-C1       | 117.97                | 119.46             | 119.58     |
| C12-O3-C15     | 116.78                | 118.73             | 118.73     |
| C13-O3-C15     | /                     | /                  | /          |
| C7-C6-C5-N1    | 150.82                | 180.00             | 0.00       |
| C8-O2-C7-O1    | 178.57                | 180.00             | 180.00     |
| C11-C12-O3-C15 | 0.56                  | 0.00               | 0.00       |
| C14-C13-O3-C15 | /                     | /                  | /          |



**Table S2.** Selected optimized bond distances (Å) and angles (°) for the low spin (LS) and high spin (HS) configurations of  $[\text{Fe}(\mathbf{L3})_3]^{3+}$  in acetonitrile (IEF-PCM SCRF model). Atom labelling scheme as in Figure S13.

|             | $[\text{Fe}(\mathbf{L3})_3]^{3+}$ |        |
|-------------|-----------------------------------|--------|
|             | LS                                | HS     |
| Fe-N1       | 1.994                             | 2.133  |
| Fe-O1       | 1.901                             | 1.976  |
| Fe-O2       | 1.921                             | 2.002  |
| Fe-N2       | 1.988                             | 2.152  |
| Fe-O3       | 1.902                             | 1.992  |
| Fe-N3       | 1.976                             | 2.139  |
| N1-Fe-O1    | 89.05                             | 84.75  |
| N1-Fe-O2    | 85.09                             | 87.22  |
| N1-Fe-N2    | 173.71                            | 168.75 |
| N1-Fe-O3    | 92.92                             | 95.65  |
| N1-Fe-N3    | 92.06                             | 95.69  |
| O1-Fe-O2    | 90.51                             | 93.60  |
| O1-Fe-N2    | 87.75                             | 89.41  |
| O1-Fe-O3    | 177.33                            | 178.42 |
| O1-Fe-N3    | 92.03                             | 93.97  |
| O2-Fe-N2    | 89.52                             | 83.54  |
| O2-Fe-O3    | 87.85                             | 89.94  |
| O2-Fe-N3    | 176.15                            | 172.10 |
| N2-Fe-O3    | 90.12                             | 90.44  |
| N2-Fe-N3    | 93.47                             | 94.30  |
| O3-Fe-N3    | 92.06                             | 84.78  |
| Fe-O1-C3    | 121.43                            | 124.07 |
| Fe-O2-C6    | 120.26                            | 122.63 |
| Fe-O3-C9    | 122.00                            | 126.32 |
| N1-C1-C2-C3 | 24.24                             | 26.56  |
| N2-C4-C5-C6 | 28.27                             | 30.37  |
| N3-C7-C8-C9 | 27.07                             | 28.19  |
| Fe-O1-C3-O4 | 145.25                            | 141.06 |
| Fe-O2-C6-O5 | 146.06                            | 138.43 |
| Fe-O3-C9-O6 | 146.94                            | 143.41 |

**Table S3.** Selected optimized bond distances (Å) and angles (°) for the low spin (LS) and high spin (HS) configurations of  $[\text{Fe}(\mathbf{L3})_2(\text{H}_2\text{O})_2]^{3+}$  in acetonitrile (IEF-PCM SCRF model). Atom labelling scheme as in Figure S13.

|             | $[\text{Fe}(\mathbf{L3})_2(\text{H}_2\text{O})_2]^{3+}$ |        |
|-------------|---------------------------------------------------------|--------|
|             | LS                                                      | HS     |
| Fe-N1       | 1.991                                                   | 2.133  |
| Fe-O1       | 1.882                                                   | 1.949  |
| Fe-O2       | 1.871                                                   | 1.953  |
| Fe-N2       | 1.982                                                   | 2.131  |
| Fe-O3       | 1.967                                                   | 2.065  |
| Fe-O4       | 1.956                                                   | 2.065  |
| N1-Fe-O1    | 88.63                                                   | 84.96  |
| N1-Fe-O2    | 86.63                                                   | 88.77  |
| N1-Fe-N2    | 176.53                                                  | 175.16 |
| N1-Fe-O3    | 93.98                                                   | 93.37  |
| N1-Fe-O4    | 89.33                                                   | 90.04  |
| O1-Fe-O2    | 92.14                                                   | 93.70  |
| O1-Fe-N2    | 89.01                                                   | 92.64  |
| O1-Fe-O3    | 175.49                                                  | 176.78 |
| O1-Fe-O4    | 87.09                                                   | 89.18  |
| O2-Fe-N2    | 90.91                                                   | 86.18  |
| O2-Fe-O3    | 91.68                                                   | 89.04  |
| O2-Fe-O4    | 175.90                                                  | 177.08 |
| N2-Fe-O3    | 88.53                                                   | 89.22  |
| N2-Fe-O4    | 93.10                                                   | 94.14  |
| O3-Fe-O4    | 89.27                                                   | 88.06  |
| Fe-O1-C3    | 121.66                                                  | 123.26 |
| Fe-O2-C6    | 123.49                                                  | 126.46 |
| N1-C1-C2-C3 | 24.62                                                   | 27.47  |
| N2-C4-C5-C6 | 24.72                                                   | 28.69  |
| Fe-O1-C3-O5 | 146.13                                                  | 140.63 |
| Fe-O2-C6-O6 | 150.92                                                  | 145.61 |

**Table S4.** Selected optimized bond distances (Å) and angles (°) for the low spin (LS) and high spin (HS) configurations of  $[\text{Fe}(\mathbf{L3})(\text{H}_2\text{O})_4]^{3+}$  in acetonitrile (IEF-PCM SCRF model). Atom labelling scheme as in Figure S13.

| $[\text{Fe}(\mathbf{L3})(\text{H}_2\text{O})_4]^{3+}$ |        |        |
|-------------------------------------------------------|--------|--------|
|                                                       | LS     | HS     |
| Fe-N1                                                 | 1.943  | 2.105  |
| Fe-O1                                                 | 1.933  | 2.067  |
| Fe-O2                                                 | 1.843  | 1.914  |
| Fe-O3                                                 | 1.974  | 2.072  |
| Fe-O4                                                 | 1.934  | 2.044  |
| Fe-O5                                                 | 1.950  | 2.079  |
| N1-Fe-O1                                              | 88.75  | 93.98  |
| N1-Fe-O2                                              | 92.48  | 86.68  |
| N1-Fe-O3                                              | 175.03 | 173.59 |
| N1-Fe-O4                                              | 95.38  | 92.10  |
| N1-Fe-O5                                              | 93.54  | 92.91  |
| O1-Fe-O2                                              | 90.35  | 87.09  |
| O1-Fe-O3                                              | 87.38  | 90.59  |
| O1-Fe-O4                                              | 175.83 | 173.66 |
| O1-Fe-O5                                              | 92.35  | 88.20  |
| O2-Fe-O3                                              | 84.43  | 87.09  |
| O2-Fe-O4                                              | 90.03  | 95.03  |
| O2-Fe-O5                                              | 173.45 | 175.22 |
| O3-Fe-O4                                              | 88.52  | 83.20  |
| O3-Fe-O5                                              | 89.74  | 82.73  |
| O4-Fe-O5                                              | 86.84  | 89.74  |
| Fe-O2-C3                                              | 123.01 | 127.38 |
| N1-C1-C2-C3                                           | 23.24  | 24.32  |
| Fe-O2-C3-O6                                           | 149.78 | 147.84 |

**Table S5.** Selected Mulliken and Natural Charges Q ( $|e|$ ) Calculated on the low spin (LS) and high spin (HS) configurations of  $[\text{Fe}(\mathbf{L3})_3]^{3+}$  in acetonitrile (IEF-PCM SCRF model). Atom labelling scheme as in Figure S13.

|    | Mulliken                          |        | NBO                               |        |
|----|-----------------------------------|--------|-----------------------------------|--------|
|    | $[\text{Fe}(\mathbf{L3})_3]^{3+}$ |        | $[\text{Fe}(\mathbf{L3})_3]^{3+}$ |        |
|    | LS                                | HS     | LS                                | HS     |
| Fe | 0.642                             | 0.981  | 0.826                             | 1.470  |
| O1 | -0.344                            | -0.388 | -0.592                            | -0.682 |
| O2 | -0.331                            | -0.365 | -0.590                            | -0.670 |
| O3 | -0.344                            | -0.383 | -0.592                            | -0.684 |
| N1 | -0.292                            | -0.353 | -0.452                            | -0.562 |
| N2 | -0.309                            | -0.344 | -0.464                            | -0.564 |
| N3 | -0.323                            | -0.373 | -0.470                            | -0.684 |
| O4 | -0.195                            | -0.194 | -0.451                            | -0.452 |
| O5 | -0.198                            | -0.197 | -0.454                            | -0.455 |
| O6 | -0.196                            | -0.197 | -0.449                            | -0.453 |

**Table S6.** Selected Mulliken and Natural Charges Q ( $|e|$ ) Calculated on the low spin (LS) and high spin (HS) configurations of  $[\text{Fe}(\mathbf{L3})_2(\text{H}_2\text{O})_2]^{3+}$  in acetonitrile (IEF-PCM SCRF model). Atom labelling scheme as in Figure S13.

|    | Mulliken                                                |        | NBO                                                     |        |
|----|---------------------------------------------------------|--------|---------------------------------------------------------|--------|
|    | $[\text{Fe}(\mathbf{L3})_2(\text{H}_2\text{O})_2]^{3+}$ |        | $[\text{Fe}(\mathbf{L3})_2(\text{H}_2\text{O})_2]^{3+}$ |        |
|    | LS                                                      | HS     | LS                                                      | HS     |
| Fe | 0.737                                                   | 1.061  | 0.913                                                   | 1.507  |
| O1 | -0.332                                                  | -0.378 | -0.575                                                  | -0.667 |
| O2 | -0.338                                                  | -0.377 | -0.58                                                   | -0.671 |
| O3 | -0.234                                                  | -0.277 | -0.843                                                  | -0.919 |
| O4 | -0.224                                                  | -0.268 | -0.836                                                  | -0.914 |
| N1 | -0.3                                                    | -0.352 | -0.457                                                  | -0.564 |
| N2 | -0.321                                                  | -0.366 | -0.464                                                  | -0.57  |
| O5 | -0.191                                                  | -0.189 | -0.448                                                  | -0.448 |
| O6 | -0.187                                                  | -0.189 | -0.444                                                  | -0.447 |

**Table S7.** Selected Mulliken and Natural Charges Q ( $|e|$ ) Calculated on the low spin (LS) and high spin (HS) configurations of  $[\text{Fe}(\mathbf{L3})(\text{H}_2\text{O})_4]^{3+}$  in acetonitrile (IEF-PCM SCRF model). Atom labelling scheme as in Figure S13.

|    | Mulliken                                              |        | NBO                                                   |        |
|----|-------------------------------------------------------|--------|-------------------------------------------------------|--------|
|    | $[\text{Fe}(\mathbf{L3})(\text{H}_2\text{O})_4]^{3+}$ |        | $[\text{Fe}(\mathbf{L3})(\text{H}_2\text{O})_4]^{3+}$ |        |
|    | LS                                                    | HS     | LS                                                    | HS     |
| Fe | 0.753                                                 | 1.121  | 0.949                                                 | 1.533  |
| O1 | -0.215                                                | -0.275 | -0.818                                                | -0.909 |
| O2 | -0.355                                                | -0.375 | -0.572                                                | -0.651 |
| O3 | -0.225                                                | -0.281 | -0.830                                                | -0.916 |
| O4 | -0.208                                                | -0.275 | -0.806                                                | -0.911 |
| O5 | -0.230                                                | -0.274 | -0.838                                                | -0.916 |
| N1 | -0.334                                                | -0.374 | -0.452                                                | -0.572 |
| O6 | -0.178                                                | -0.177 | -0.436                                                | -0.437 |

**Table S8.** calculated concentrations of each complex species for systems containing L3-Fe(III)-Au(III) (A), L3-Fe(III)-Y(III) (C), L3-Fe(III)-Ga(III) (E) and L3-Fe(III)-Au(III)-Y(III)-Ga(III) (G) at  $1 \times 10^{-5}$  M, L3-Fe(III)-Au(III) (B), L3-Fe(III)-Y(III) (D), L3-Fe(III)-Ga(III) (F) and L3-Fe(III)-Au(III)-Y(III)-Ga(III) (H) at metal concentration  $1 \times 10^{-6}$  M and ligand concentration at  $1 \times 10^{-6}$  M.

| conditions       | point 1     |
|------------------|-------------|------------------|-------------|------------------|-------------|------------------|-------------|
| total Fe         | 1.000E-05   | total Fe         | 1.000E-06   | total Fe         | 1.000E-05   | total Fe         | 1.000E-06   |
| total Au         | 1.000E-05   | total Au         | 1.000E-06   | total Y          | 1.000E-05   | total Y          | 1.000E-06   |
| total L          | 1.000E-05   |
| p(Fe)            | (set pX)    |
| p(Au)            | (set pX)    | p(Au)            | (set pX)    | p(Y)             | (set pX)    | p(Y)             | (set pX)    |
| p(L)             | (set pX)    |
| results          | concn./M    | results          | concn./M    | results          | concn./M    | results          | concn./M    |
| free Fe          | 2.06850E-06 | free Fe          | 1.16495E-15 | free Fe          | 2.40934E-06 | free Fe          | 2.56422E-15 |
| free Au          | 9.99683E-06 | free Au          | 5.53380E-07 | free Y           | 9.32729E-06 | free Y           | 1.86925E-10 |
| free L           | 2.57458E-09 | free L           | 6.56016E-06 | free L           | 2.19831E-09 | free L           | 5.03967E-06 |
| AuL              | 3.16642E-09 | AuL              | 4.46620E-07 | YL               | 6.63506E-07 | YL               | 3.04838E-08 |
| FeL              | 5.97534E-06 | FeL              | 8.57474E-12 | YL <sub>2</sub>  | 9.20309E-09 | YL <sub>2</sub>  | 9.69329E-07 |
| FeL <sub>2</sub> | 1.84955E-06 | FeL <sub>2</sub> | 6.76292E-09 | FeL              | 5.94274E-06 | FeL              | 1.44996E-11 |
| FeL <sub>3</sub> | 1.06604E-07 | FeL <sub>3</sub> | 9.93228E-07 | FeL <sub>2</sub> | 1.57063E-06 | FeL <sub>2</sub> | 8.78534E-09 |
|                  |             |                  |             | FeL <sub>3</sub> | 7.72972E-08 | FeL <sub>3</sub> | 9.91200E-07 |

A
B
C
D

| conditions       | point 1     | conditions       | point 1     |
|------------------|-------------|------------------|-------------|
| total Fe         | 1.000E-06   | total Fe         | 1.000E-05   |
| total Ga         | 1.000E-06   | total Ga         | 1.000E-05   |
| total L          | 1.000E-05   | total L          | 1.000E-05   |
| p(Fe)            | (set pX)    | p(Fe)            | (set pX)    |
| p(Ga)            | (set pX)    | p(Ga)            | (set pX)    |
| p(L)             | (set pX)    | p(L)             | (set pX)    |
| results          | concn./M    | results          | concn./M    |
| free Fe          | 4.50394E-15 | free Fe          | 2.13322E-06 |
| free Ga          | 4.12927E-10 | free Ga          | 9.86348E-06 |
| free L           | 4.17438E-06 | free L           | 2.49591E-09 |
| GaL              | 9.47252E-09 | GaL              | 1.35288E-07 |
| GaL <sub>2</sub> | 1.43568E-07 | GaL <sub>2</sub> | 1.22599E-09 |
| GaL <sub>3</sub> | 8.46546E-07 | GaL <sub>3</sub> | 4.32233E-12 |
| FeL              | 2.10953E-11 | FeL              | 5.97398E-06 |
| FeL <sub>2</sub> | 1.05871E-08 | FeL <sub>2</sub> | 1.79263E-06 |
| FeL <sub>3</sub> | 9.89392E-07 | FeL <sub>3</sub> | 1.00166E-07 |

E
F

| conditions        | point 1     | conditions        | point 1     |
|-------------------|-------------|-------------------|-------------|
| total Fe          | 1.000E-05   | total Fe          | 1.000E-06   |
| total Au          | 1.000E-05   | total Au          | 1.000E-06   |
| total Y           | 1.000E-05   | total Y           | 1.000E-06   |
| total Ga          | 1.000E-05   | total Ga          | 1.000E-06   |
| total L           | 1.000E-05   | total L           | 1.000E-05   |
| p(Fe)             | (set pX)    | p(Fe)             | (set pX)    |
| p(Au)             | (set pX)    | p(Au)             | (set pX)    |
| p(Y)              | (set pX)    | p(Y)              | (set pX)    |
| p(Ga)             | (set pX)    | p(Ga)             | (set pX)    |
| p(L)              | (set pX)    | p(L)              | (set pX)    |
| results           | concn./M    | results           | concn./M    |
| free Fe           | 2.41057E-06 | free Fe           | 3.20511E-15 |
| free Au           | 9.99730E-06 | free Au           | 6.34739E-07 |
| free Y            | 9.32764E-06 | free Y            | 2.16481E-10 |
| free Ga           | 1.00000E-05 | free Ga           | 9.99999E-07 |
| free L            | 2.19710E-09 | free L            | 4.67743E-06 |
| AuL               | 2.70229E-09 | AuL               | 3.65261E-07 |
| FeL               | 5.94251E-06 | FeL               | 1.68210E-11 |
| FeL <sub>2</sub>  | 1.56971E-06 | FeL <sub>2</sub>  | 9.45926E-09 |
| FeL <sub>3</sub>  | 7.72090E-08 | FeL <sub>3</sub>  | 9.90524E-07 |
| YL                | 6.63164E-07 | YL                | 3.27662E-08 |
| YL <sub>2</sub>   | 9.19328E-09 | YL <sub>2</sub>   | 9.67017E-07 |
| YGaL              | 1.12621E-12 | YGaL              | 5.56449E-15 |
| YGaL <sub>2</sub> | 8.98401E-15 | YGaL <sub>2</sub> | 9.45003E-14 |
| YGaL <sub>3</sub> | 2.78818E-17 | YGaL <sub>3</sub> | 6.24369E-13 |

**G**

**H**
